# Supplementary material
Source: publisher figshare collection journal article supplement (https://acs.figshare.com/ndownloader/files/4187599)
Supplement: Supplementary file 1 [file 4187599]

data_General
_publ_requested_journal          'ENTER JOURNAL NAME HERE'

#==============================================================================

# SUBMISSION DETAILS

_publ_contact_author_name        'Prof. Akiko Kobayashi'
_publ_contact_author_address     
;
Department of Chemistry, College of Humanities and Sciences,
Nihon University,Sakurajosui,Setagaya-ku,Tokyo 156-8550,Japan
;
_publ_contact_author_email       akoba@chs.nihon-u.ac.jp
_publ_contact_author_phone       (+81)-3-3303-9899
_publ_contact_author_fax         (+81)-3-3329-1151
loop_
_publ_author_name
_publ_author_address
'FIRST AUTHORS NAME'
;
  FIRST AUTHORS ADDRESS
;
_audit_creation_date             2011-10-31
_audit_creation_method           'by CrystalStructure 3.8'
_audit_update_record             
;
?

2011-12-05 # Formatted by publCIF
;


#==============================================================================

# PROCESSING SUMMARY (IUCr Office Use Only)

_journal_date_recd_electronic    ?
_journal_date_from_coeditor      ?
_journal_date_accepted           ?
_journal_coeditor_code           ?
_publ_contact_letter             
;
    ENTER TEXT OF LETTER
;
_publ_requested_coeditor_name    ?

#==============================================================================

# TITLE AND AUTHOR LIST

_publ_section_title              
;
ENTER SECTION TITLE
;
_publ_section_title_footnote     
;
 ENTER FOOTNOTE TO TITLE OF PAPER
;
loop_
_publ_author_footnote
;
  FIRST AUTHORS FOOTNOTES
;
_publ_section_synopsis           
;
ENTER SYNOPSIS
;

#==============================================================================

# TEXT

_publ_section_abstract           
;
ENTER ABSTRACT
;
_publ_section_comment            
;
ENTER TEXT
;
_publ_section_references         
;
ENTER OTHER REFERENCES

Rigaku Americas and Rigaku Corporation. (2007). <i>CrystalStructure</i>
(Version 3.8). Single Crystal Structure Analysis Software. Rigaku Americas,
9009 TX, USA 77381-5209. Rigaku, Tokyo 196-8666, Japan.

Altomare, A., Cascarano, G., Giacovazzo, C., Guagliardi, A., Burla, M.,
Polidori, G. & Camalli, M. (1994). J. Appl. Cryst., 27, 435. <i>SIR92</i>

Carruthers, J. R., Rollett, J. S., Betteridge, P. W., Kinna, D., Pearce, L.,
Larsen, A. & Gabe, E. (1999). <i>CRYSTALS</i> Issue 11, Chemical
Crystallography Laboratory, Oxford, UK.

Carruthers, J. R. & Watkin, D. J. (1979). <i>Acta Cryst.</i> A<b>35</b>,
698--699.
;
_publ_section_figure_captions    
;


ENTER FIGURE CAPTIONS
;
_publ_section_exptl_prep         
;
ENTER COMPOUND PREPARATION DETAILS
;
_publ_section_exptl_refinement   
;
ENTER SPECIAL DETAILS OF THE REFINEMENT
;

#==============================================================================

data_(nBu4N)2[Ni(dmstfdt)2]


_diffrn_ambient_temperature   293
#Added by publCIF


#==============================================================================

# CHEMICAL DATA

_chemical_formula_sum                  'C48 H84 N2 Ni S8 Se4 '
_chemical_formula_moiety               'C48 H84 N2 Ni S8 Se4 '
_chemical_formula_weight               1320.23
_chemical_melting_point                ?

#==============================================================================

# CRYSTAL DATA
_symmetry_cell_setting                 triclinic
_symmetry_space_group_name_H-M        'P -1'
_symmetry_space_group_name_Hall       '-P 1'
_symmetry_Int_Tables_number            2
loop_
_symmetry_equiv_pos_site_id
_symmetry_equiv_pos_as_xyz
1   '+X,+Y,+Z'
2   '-X,-Y,-Z'

#------------------------------------------------------------------------------

_cell_length_a                         13.294(5)
_cell_length_b                         13.984(6)
_cell_length_c                         18.332(8)
_cell_angle_alpha                      111.146(4)
_cell_angle_beta                       108.170(4)
_cell_angle_gamma                      90.953(5)
_cell_volume                           2988(2)
_cell_formula_units_Z                  2
_cell_measurement_reflns_used          6994
_cell_measurement_theta_min            3.1
_cell_measurement_theta_max            27.5
_cell_measurement_temperature          293.1

#------------------------------------------------------------------------------

_exptl_crystal_description            'block'
_exptl_crystal_colour                 'dark brown'
_exptl_crystal_size_max                0.20
_exptl_crystal_size_mid                0.20
_exptl_crystal_size_min                0.20
_exptl_crystal_density_diffrn          1.467
_exptl_crystal_density_meas            ?
_exptl_crystal_density_method         'not measured'
_exptl_crystal_F_000                   1356.00
_exptl_absorpt_coefficient_mu          3.073
_exptl_absorpt_correction_type         multi-scan
_exptl_absorpt_process_details         
'Jacobson, R. (1998) Private communication'
_exptl_absorpt_correction_T_min        0.443
_exptl_absorpt_correction_T_max        0.541

#==============================================================================

# EXPERIMENTAL DATA

_diffrn_radiation_type                'Mo K\a'
_diffrn_radiation_wavelength           0.71070
_diffrn_measurement_device_type       'Rigaku Mercury'
_diffrn_measurement_method             \w
_diffrn_detector_area_resol_mean       7.31
_diffrn_reflns_number                  47176
_diffrn_reflns_av_R_equivalents        0.052
_diffrn_reflns_theta_max               27.54
_diffrn_measured_fraction_theta_max    0.995
_diffrn_reflns_theta_full              27.54
_diffrn_measured_fraction_theta_full   0.995
_diffrn_reflns_limit_h_min             -17
_diffrn_reflns_limit_h_max             17
_diffrn_reflns_limit_k_min             -18
_diffrn_reflns_limit_k_max             18
_diffrn_reflns_limit_l_min             -23
_diffrn_reflns_limit_l_max             23

#==============================================================================

# REFINEMENT DATA

_refine_special_details
;
    Refinement was performed using reflections with F^2^ > 2.0 sigma(F^2^).
    The weighted R-factor(wR), goodness of fit (S) and R-factor (gt) are 
    based on F, with F set to zero for negative F. The threshold expression of
    F^2^ > 2.0 sigma(F^2^) is used only for calculating R-factor (gt).
;
_reflns_number_total                   13707
_reflns_number_gt                      30429
_reflns_threshold_expression           F^2^>2.0\s(F^2^)
_refine_ls_structure_factor_coef       F
_refine_ls_R_factor_gt                 0.0701
_refine_ls_wR_factor_ref               0.0729
_refine_ls_hydrogen_treatment          refall
_refine_ls_number_reflns               30843
_refine_ls_number_parameters           652
_refine_ls_goodness_of_fit_ref         1.075
_refine_ls_weighting_scheme            calc
_refine_ls_weighting_details
;
    Chebychev polynomial with 3 parameters (Carruthers & Watkin, 1979)
    12.3567    -3.4063    7.5027
;
_refine_ls_shift/su_max                0.0495
_refine_diff_density_max               6.33
_refine_diff_density_min               -2.53
_refine_ls_extinction_method           none
_refine_ls_extinction_coef             ?

loop_
_atom_type_symbol
_atom_type_description
_atom_type_scat_dispersion_real
_atom_type_scat_dispersion_imag
_atom_type_scat_source
  'C' 'C'  0.003 0.002 
;
International Tables for Crystallography
(1992, Vol. C, Tables 4.2.6.8 and 6.1.1.4)
;
  'H' 'H'  0.000 0.000 
;
International Tables for Crystallography
(1992, Vol. C, Table 6.1.1.4)
;
  'N' 'N'  0.006 0.003 
;
International Tables for Crystallography
(1992, Vol. C, Tables 4.2.6.8 and 6.1.1.4)
;
  'Ni' 'Ni'  0.339 1.112 
;
International Tables for Crystallography
(1992, Vol. C, Tables 4.2.6.8 and 6.1.1.4)
;
  'S' 'S'  0.125 0.123 
;
International Tables for Crystallography
(1992, Vol. C, Tables 4.2.6.8 and 6.1.1.4)
;
  'Se' 'Se'  -0.093 2.226 
;
International Tables for Crystallography
(1992, Vol. C, Tables 4.2.6.8 and 6.1.1.4)
;

#==============================================================================

# ATOMIC COORDINATES AND THERMAL PARAMETERS

loop_
_atom_site_label
_atom_site_type_symbol
_atom_site_fract_x
_atom_site_fract_y
_atom_site_fract_z
_atom_site_U_iso_or_equiv
_atom_site_adp_type
_atom_site_occupancy
_atom_site_symmetry_multiplicity
_atom_site_calc_flag
_atom_site_refinement_flags
_atom_site_disorder_assembly
_atom_site_disorder_group
 Se(1) Se 0.35880(3) -0.10500(3) -0.05219(2) 0.06648(11) Uani 1.00 1 d . . .
 Se(2) Se 0.49244(3) -0.10022(3) 0.12605(3) 0.07222(13) Uani 1.00 1 d . . .
 Se(3) Se -0.15408(4) 0.82478(4) 0.35250(3) 0.07593(14) Uani 1.00 1 d . . .
 Se(4) Se 0.00726(4) 0.86137(3) 0.53208(3) 0.07195(13) Uani 1.00 1 d . . .
 Ni(1) Ni 0.25744(3) 0.44137(3) 0.23405(3) 0.05518(12) Uani 1.00 1 d . . .
 S(1) S 0.24246(8) 0.33843(8) 0.10685(6) 0.0640(2) Uani 1.00 1 d . . .
 S(2) S 0.35772(8) 0.34248(7) 0.28846(6) 0.0679(2) Uani 1.00 1 d . . .
 S(3) S 0.27656(8) 0.11237(8) 0.03889(6) 0.0715(3) Uani 1.00 1 d . . .
 S(4) S 0.39101(9) 0.11808(8) 0.20678(6) 0.0737(3) Uani 1.00 1 d . . .
 S(5) S 0.12174(8) 0.51397(7) 0.18329(5) 0.0618(2) Uani 1.00 1 d . . .
 S(6) S 0.29681(7) 0.55818(7) 0.36117(5) 0.0581(2) Uani 1.00 1 d . . .
 S(7) S 0.00588(9) 0.67649(8) 0.27154(6) 0.0766(3) Uani 1.00 1 d . . .
 S(8) S 0.16409(9) 0.71468(8) 0.43664(6) 0.0722(3) Uani 1.00 1 d . . .
 N(1) N -0.1127(2) 0.2276(2) -0.06467(17) 0.0549(8) Uani 1.00 1 d . . .
 N(2) N 0.3053(2) 0.4303(2) 0.56111(18) 0.0603(9) Uani 1.00 1 d . . .
 C(1) C 0.2933(2) 0.2308(2) 0.1235(2) 0.0621(10) Uani 1.00 1 d . . .
 C(2) C 0.3447(2) 0.2349(2) 0.1997(2) 0.0630(11) Uani 1.00 1 d . . .
 C(3) C 0.3609(2) 0.0523(2) 0.0981(2) 0.0647(11) Uani 1.00 1 d . . .
 C(4) C 0.3965(2) -0.0318(2) 0.0654(2) 0.0658(12) Uani 1.00 1 d . . .
 C(5) C 0.4490(3) -0.2070(3) -0.0414(2) 0.0714(13) Uani 1.00 1 d . . .
 C(6) C 0.5046(3) -0.2036(3) 0.0327(2) 0.0773(14) Uani 1.00 1 d . . .
 C(7) C 0.4505(3) -0.2863(3) -0.1287(2) 0.0929(15) Uani 1.00 1 d . . .
 C(8) C 0.5813(3) -0.2823(3) 0.0454(3) 0.124(2) Uani 1.00 1 d . . .
 C(9) C 0.1136(2) 0.6055(2) 0.2740(2) 0.0599(11) Uani 1.00 1 d . . .
 C(10) C 0.1883(2) 0.6239(2) 0.3500(2) 0.0567(10) Uani 1.00 1 d . . .
 C(11) C 0.0401(3) 0.7373(2) 0.3806(2) 0.0650(11) Uani 1.00 1 d . . .
 C(12) C -0.0247(3) 0.7969(2) 0.4160(2) 0.0641(11) Uani 1.00 1 d . . .
 C(13) C -0.1865(3) 0.9101(3) 0.4466(2) 0.0748(14) Uani 1.00 1 d . . .
 C(14) C -0.1169(3) 0.9255(3) 0.5229(2) 0.0758(14) Uani 1.00 1 d . . .
 C(15) C -0.2860(3) 0.9589(4) 0.4267(3) 0.106(2) Uani 1.00 1 d . . .
 C(16) C -0.1281(4) 0.9947(3) 0.6040(2) 0.1042(19) Uani 1.00 1 d . . .
 C(17) C -0.2114(2) 0.1727(2) -0.1407(2) 0.0620(10) Uani 1.00 1 d . . .
 C(18) C -0.2340(2) 0.2128(2) -0.2094(2) 0.0676(11) Uani 1.00 1 d . . .
 C(19) C -0.3381(3) 0.1512(3) -0.2762(2) 0.0983(16) Uani 1.00 1 d . . .
 C(20) C -0.3697(4) 0.1786(4) -0.3497(2) 0.115(2) Uani 1.00 1 d . . .
 C(21) C -0.1224(3) 0.3403(2) -0.0206(2) 0.0706(11) Uani 1.00 1 d . . .
 C(22) C -0.2124(4) 0.3587(3) 0.0119(3) 0.0974(17) Uani 1.00 1 d . . .
 C(23) C -0.2032(4) 0.4821(5) 0.0549(4) 0.155(2) Uani 1.00 1 d . . .
 C(24) C -0.2703(6) 0.5083(6) 0.0958(5) 0.217(4) Uani 1.00 1 d . . .
 C(25) C -0.1054(2) 0.1668(2) -0.0092(2) 0.0621(11) Uani 1.00 1 d . . .
 C(26) C -0.0112(3) 0.2060(3) 0.0722(2) 0.0813(14) Uani 1.00 1 d . . .
 C(27) C -0.0127(3) 0.1403(3) 0.1201(2) 0.0914(16) Uani 1.00 1 d . . .
 C(28) C 0.0814(4) 0.1621(3) 0.1967(2) 0.1037(18) Uani 1.00 1 d . . .
 C(29) C -0.0117(2) 0.2303(2) -0.0877(2) 0.0576(10) Uani 1.00 1 d . . .
 C(30) C 0.0157(2) 0.1271(2) -0.1332(2) 0.0685(12) Uani 1.00 1 d . . .
 C(31) C 0.1171(3) 0.1429(3) -0.1526(2) 0.0768(14) Uani 1.00 1 d . . .
 C(32) C 0.1541(3) 0.0416(3) -0.1947(2) 0.0982(18) Uani 1.00 1 d . . .
 C(33) C 0.1873(2) 0.3954(3) 0.5113(2) 0.0687(12) Uani 1.00 1 d . . .
 C(34) C 0.1464(3) 0.4185(3) 0.4338(2) 0.0766(13) Uani 1.00 1 d . . .
 C(35) C 0.0290(3) 0.3810(3) 0.3897(2) 0.0880(15) Uani 1.00 1 d . . .
 C(36) C -0.0202(3) 0.4153(3) 0.3187(2) 0.0972(17) Uani 1.00 1 d . . .
 C(37) C 0.3368(2) 0.5446(2) 0.5833(2) 0.0591(10) Uani 1.00 1 d . . .
 C(38) C 0.2758(2) 0.6171(2) 0.6297(2) 0.0703(12) Uani 1.00 1 d . . .
 C(39) C 0.3233(3) 0.7289(2) 0.6530(2) 0.0801(13) Uani 1.00 1 d . . .
 C(40) C 0.2637(3) 0.8084(3) 0.6984(3) 0.1133(18) Uani 1.00 1 d . . .
 C(41) C 0.3242(3) 0.4051(3) 0.6377(2) 0.0687(12) Uani 1.00 1 d . . .
 C(42) C 0.4370(3) 0.4318(3) 0.6997(2) 0.0761(13) Uani 1.00 1 d . . .
 C(43) C 0.4436(3) 0.3888(4) 0.7657(3) 0.109(2) Uani 1.00 1 d . . .
 C(44) C 0.5491(4) 0.4167(4) 0.8312(3) 0.128(2) Uani 1.00 1 d . . .
 C(45) C 0.3754(3) 0.3766(3) 0.5120(2) 0.0738(13) Uani 1.00 1 d . . .
 C(46) C 0.3652(4) 0.2608(3) 0.4838(3) 0.1075(19) Uani 1.00 1 d . . .
 C(47) C 0.4613(4) 0.2237(3) 0.4506(3) 0.113(2) Uani 1.00 1 d . . .
 C(48) C 0.4601(6) 0.1189(4) 0.4213(3) 0.162(3) Uani 1.00 1 d . . .
 H(1) H 0.3957 -0.3435 -0.1499 0.100 Uiso 1.00 1 c R . .
 H(2) H 0.5180 -0.3103 -0.1223 0.101 Uiso 1.00 1 c R . .
 H(3) H 0.4383 -0.2521 -0.1663 0.100 Uiso 1.00 1 c R . .
 H(4) H 0.6506 -0.2569 0.0498 0.156 Uiso 1.00 1 c R . .
 H(5) H 0.5561 -0.3472 -0.0002 0.156 Uiso 1.00 1 c R . .
 H(6) H 0.5847 -0.2906 0.0952 0.156 Uiso 1.00 1 c R . .
 H(7) H -0.2680 1.0241 0.4253 0.138 Uiso 1.00 1 c R . .
 H(8) H -0.3178 0.9687 0.4682 0.138 Uiso 1.00 1 c R . .
 H(9) H -0.3351 0.9149 0.3740 0.138 Uiso 1.00 1 c R . .
 H(10) H -0.1645 0.9547 0.6229 0.132 Uiso 1.00 1 c R . .
 H(11) H -0.1670 1.0490 0.5972 0.132 Uiso 1.00 1 c R . .
 H(12) H -0.0586 1.0233 0.6438 0.132 Uiso 1.00 1 c R . .
 H(13) H -0.2036 0.1017 -0.1634 0.071 Uiso 1.00 1 c R . .
 H(14) H -0.2721 0.1787 -0.1233 0.071 Uiso 1.00 1 c R . .
 H(15) H -0.2398 0.2845 -0.1885 0.076 Uiso 1.00 1 c R . .
 H(16) H -0.1779 0.2026 -0.2319 0.077 Uiso 1.00 1 c R . .
 H(17) H -0.3313 0.0796 -0.2932 0.111 Uiso 1.00 1 c R . .
 H(18) H -0.3929 0.1642 -0.2523 0.111 Uiso 1.00 1 c R . .
 H(19) H -0.4115 0.2335 -0.3419 0.132 Uiso 1.00 1 c R . .
 H(20) H -0.4098 0.1202 -0.3978 0.133 Uiso 1.00 1 c R . .
 H(21) H -0.3064 0.2003 -0.3566 0.132 Uiso 1.00 1 c R . .
 H(22) H -0.0580 0.3714 0.0252 0.078 Uiso 1.00 1 c R . .
 H(23) H -0.1306 0.3734 -0.0588 0.077 Uiso 1.00 1 c R . .
 H(24) H -0.2787 0.3303 -0.0324 0.123 Uiso 1.00 1 c R . .
 H(25) H -0.2061 0.3282 0.0515 0.123 Uiso 1.00 1 c R . .
 H(26) H -0.1316 0.5097 0.0908 0.169 Uiso 1.00 1 c R . .
 H(27) H -0.2215 0.5096 0.0129 0.169 Uiso 1.00 1 c R . .
 H(28) H -0.3379 0.5144 0.0612 0.256 Uiso 1.00 1 c R . .
 H(29) H -0.2407 0.5726 0.1413 0.256 Uiso 1.00 1 c R . .
 H(30) H -0.2792 0.4562 0.1161 0.256 Uiso 1.00 1 c R . .
 H(31) H -0.1693 0.1686 0.0038 0.077 Uiso 1.00 1 c R . .
 H(32) H -0.0996 0.0971 -0.0396 0.077 Uiso 1.00 1 c R . .
 H(33) H 0.0539 0.2041 0.0607 0.095 Uiso 1.00 1 c R . .
 H(34) H -0.0159 0.2753 0.1042 0.096 Uiso 1.00 1 c R . .
 H(35) H -0.0744 0.1495 0.1362 0.112 Uiso 1.00 1 c R . .
 H(36) H -0.0185 0.0703 0.0838 0.112 Uiso 1.00 1 c R . .
 H(37) H 0.1339 0.1211 0.1826 0.128 Uiso 1.00 1 c R . .
 H(38) H 0.0611 0.1460 0.2367 0.128 Uiso 1.00 1 c R . .
 H(39) H 0.1100 0.2334 0.2192 0.128 Uiso 1.00 1 c R . .
 H(40) H -0.0196 0.2697 -0.1214 0.068 Uiso 1.00 1 c R . .
 H(41) H 0.0472 0.2632 -0.0376 0.068 Uiso 1.00 1 c R . .
 H(42) H 0.0268 0.0869 -0.0999 0.083 Uiso 1.00 1 c R . .
 H(43) H -0.0421 0.0922 -0.1836 0.083 Uiso 1.00 1 c R . .
 H(44) H 0.1035 0.1799 -0.1883 0.103 Uiso 1.00 1 c R . .
 H(45) H 0.1728 0.1822 -0.1020 0.103 Uiso 1.00 1 c R . .
 H(46) H 0.2013 0.0216 -0.1536 0.133 Uiso 1.00 1 c R . .
 H(47) H 0.1897 0.0492 -0.2303 0.133 Uiso 1.00 1 c R . .
 H(48) H 0.0930 -0.0100 -0.2265 0.133 Uiso 1.00 1 c R . .
 H(49) H 0.1733 0.3225 0.4947 0.082 Uiso 1.00 1 c R . .
 H(50) H 0.1475 0.4283 0.5461 0.082 Uiso 1.00 1 c R . .
 H(51) H 0.1588 0.4913 0.4490 0.092 Uiso 1.00 1 c R . .
 H(52) H 0.1842 0.3853 0.3976 0.092 Uiso 1.00 1 c R . .
 H(53) H 0.0187 0.3074 0.3675 0.106 Uiso 1.00 1 c R . .
 H(54) H -0.0063 0.4056 0.4292 0.106 Uiso 1.00 1 c R . .
 H(55) H -0.0446 0.4797 0.3398 0.119 Uiso 1.00 1 c R . .
 H(56) H -0.0786 0.3656 0.2768 0.119 Uiso 1.00 1 c R . .
 H(57) H 0.0326 0.4238 0.2958 0.119 Uiso 1.00 1 c R . .
 H(58) H 0.4106 0.5633 0.6160 0.070 Uiso 1.00 1 c R . .
 H(59) H 0.3254 0.5545 0.5329 0.070 Uiso 1.00 1 c R . .
 H(60) H 0.2024 0.6047 0.5964 0.080 Uiso 1.00 1 c R . .
 H(61) H 0.2826 0.6061 0.6791 0.080 Uiso 1.00 1 c R . .
 H(62) H 0.3963 0.7407 0.6871 0.091 Uiso 1.00 1 c R . .
 H(63) H 0.3184 0.7380 0.6031 0.091 Uiso 1.00 1 c R . .
 H(64) H 0.2060 0.8227 0.6595 0.123 Uiso 1.00 1 c R . .
 H(65) H 0.3105 0.8709 0.7355 0.123 Uiso 1.00 1 c R . .
 H(66) H 0.2365 0.7791 0.7290 0.123 Uiso 1.00 1 c R . .
 H(67) H 0.2796 0.4414 0.6665 0.089 Uiso 1.00 1 c R . .
 H(68) H 0.3040 0.3327 0.6195 0.089 Uiso 1.00 1 c R . .
 H(69) H 0.4850 0.4035 0.6712 0.094 Uiso 1.00 1 c R . .
 H(70) H 0.4558 0.5050 0.7259 0.094 Uiso 1.00 1 c R . .
 H(71) H 0.3909 0.4132 0.7903 0.135 Uiso 1.00 1 c R . .
 H(72) H 0.4294 0.3154 0.7392 0.135 Uiso 1.00 1 c R . .
 H(73) H 0.5941 0.3668 0.8158 0.168 Uiso 1.00 1 c R . .
 H(74) H 0.5420 0.4204 0.8821 0.168 Uiso 1.00 1 c R . .
 H(75) H 0.5796 0.4825 0.8379 0.168 Uiso 1.00 1 c R . .
 H(76) H 0.3586 0.3922 0.4636 0.093 Uiso 1.00 1 c R . .
 H(77) H 0.4479 0.4038 0.5457 0.094 Uiso 1.00 1 c R . .
 H(78) H 0.3699 0.2421 0.5296 0.130 Uiso 1.00 1 c R . .
 H(79) H 0.2984 0.2296 0.4408 0.130 Uiso 1.00 1 c R . .
 H(80) H 0.4566 0.2470 0.4071 0.140 Uiso 1.00 1 c R . .
 H(81) H 0.5267 0.2554 0.4951 0.141 Uiso 1.00 1 c R . .
 H(82) H 0.5002 0.0994 0.4652 0.191 Uiso 1.00 1 c R . .
 H(83) H 0.4908 0.0991 0.3786 0.191 Uiso 1.00 1 c R . .
 H(84) H 0.3883 0.0853 0.3994 0.192 Uiso 1.00 1 c R . .


loop_
_atom_site_aniso_label
_atom_site_aniso_U_11
_atom_site_aniso_U_22
_atom_site_aniso_U_33
_atom_site_aniso_U_12
_atom_site_aniso_U_13
_atom_site_aniso_U_23
 Se(1) 0.0676(2) 0.0726(2) 0.0617(2) 0.0220(2) 0.0267(2) 0.0241(2)
 Se(2) 0.0673(2) 0.0851(2) 0.0743(2) 0.0225(2) 0.0248(2) 0.0408(2)
 Se(3) 0.0767(2) 0.0838(2) 0.0757(2) 0.0223(2) 0.0275(2) 0.0384(2)
 Se(4) 0.0803(2) 0.0708(2) 0.0673(2) 0.0142(2) 0.0287(2) 0.0263(2)
 Ni(1) 0.0492(2) 0.0560(2) 0.0526(2) 0.0023(2) 0.0146(2) 0.0148(2)
 S(1) 0.0657(5) 0.0672(5) 0.0583(5) 0.0126(4) 0.0190(4) 0.0251(4)
 S(2) 0.0726(6) 0.0613(5) 0.0564(5) 0.0138(4) 0.0098(4) 0.0176(4)
 S(3) 0.0755(6) 0.0708(6) 0.0584(5) 0.0185(5) 0.0148(5) 0.0204(4)
 S(4) 0.0835(7) 0.0703(6) 0.0601(5) 0.0188(5) 0.0143(5) 0.0253(5)
 S(5) 0.0703(6) 0.0573(5) 0.0500(4) 0.0107(4) 0.0134(4) 0.0179(4)
 S(6) 0.0550(5) 0.0554(5) 0.0536(5) 0.0036(4) 0.0118(4) 0.0154(4)
 S(7) 0.0905(7) 0.0768(6) 0.0584(5) 0.0386(5) 0.0175(5) 0.0269(5)
 S(8) 0.0832(6) 0.0681(6) 0.0534(5) 0.0257(5) 0.0168(5) 0.0150(4)
 N(1) 0.0595(17) 0.0450(15) 0.0580(17) 0.0064(13) 0.0172(14) 0.0198(13)
 N(2) 0.0580(17) 0.0654(18) 0.0657(18) 0.0095(14) 0.0296(15) 0.0273(15)
 C(1) 0.056(2) 0.065(2) 0.059(2) 0.0087(17) 0.0130(17) 0.0223(18)
 C(2) 0.065(2) 0.061(2) 0.064(2) 0.0175(18) 0.0163(19) 0.0285(18)
 C(3) 0.061(2) 0.058(2) 0.073(2) 0.0098(18) 0.0243(19) 0.0230(19)
 C(4) 0.059(2) 0.061(2) 0.085(2) 0.0125(18) 0.039(2) 0.025(2)
 C(5) 0.063(2) 0.080(2) 0.084(2) 0.015(2) 0.034(2) 0.039(2)
 C(6) 0.060(2) 0.083(2) 0.105(3) 0.011(2) 0.040(2) 0.044(2)
 C(7) 0.083(3) 0.058(2) 0.109(3) 0.024(2) 0.018(2) 0.012(2)
 C(8) 0.068(2) 0.107(3) 0.214(6) 0.026(2) 0.018(3) 0.107(4)
 C(9) 0.067(2) 0.055(2) 0.065(2) 0.0151(17) 0.0246(19) 0.0295(17)
 C(10) 0.068(2) 0.0483(18) 0.0515(19) 0.0081(16) 0.0193(17) 0.0170(15)
 C(11) 0.076(2) 0.057(2) 0.068(2) 0.0219(19) 0.027(2) 0.0293(18)
 C(12) 0.073(2) 0.058(2) 0.063(2) 0.0112(19) 0.022(2) 0.0275(18)
 C(13) 0.074(2) 0.077(2) 0.096(3) 0.023(2) 0.046(2) 0.044(2)
 C(14) 0.084(2) 0.066(2) 0.090(3) 0.015(2) 0.050(2) 0.027(2)
 C(15) 0.095(3) 0.126(4) 0.125(4) 0.052(3) 0.055(3) 0.062(3)
 C(16) 0.110(3) 0.117(4) 0.102(3) 0.034(3) 0.065(3) 0.036(3)
 C(17) 0.052(2) 0.057(2) 0.067(2) 0.0010(17) 0.0162(17) 0.0169(18)
 C(18) 0.060(2) 0.066(2) 0.066(2) 0.0011(18) 0.0114(18) 0.0217(19)
 C(19) 0.095(3) 0.100(3) 0.082(3) -0.009(2) 0.001(2) 0.041(2)
 C(20) 0.115(4) 0.123(4) 0.093(3) -0.009(3) 0.006(3) 0.053(3)
 C(21) 0.083(2) 0.046(2) 0.065(2) 0.0127(19) 0.013(2) 0.0116(17)
 C(22) 0.128(4) 0.078(2) 0.102(3) 0.046(2) 0.063(3) 0.030(2)
 C(23) 0.111(4) 0.171(6) 0.140(5) 0.066(4) 0.055(4) -0.000(4)
 C(24) 0.216(9) 0.179(8) 0.245(10) 0.081(7) 0.095(8) 0.053(7)
 C(25) 0.070(2) 0.051(2) 0.072(2) 0.0066(17) 0.0293(19) 0.0270(18)
 C(26) 0.093(3) 0.073(2) 0.072(2) 0.005(2) 0.014(2) 0.034(2)
 C(27) 0.096(3) 0.095(3) 0.088(3) 0.002(2) 0.014(2) 0.057(2)
 C(28) 0.120(4) 0.105(3) 0.095(3) 0.007(3) 0.025(3) 0.059(3)
 C(29) 0.0495(19) 0.061(2) 0.060(2) 0.0007(16) 0.0121(17) 0.0262(17)
 C(30) 0.066(2) 0.072(2) 0.070(2) 0.018(2) 0.025(2) 0.028(2)
 C(31) 0.071(2) 0.102(3) 0.084(2) 0.027(2) 0.036(2) 0.057(2)
 C(32) 0.097(3) 0.129(4) 0.106(3) 0.058(3) 0.059(3) 0.065(3)
 C(33) 0.062(2) 0.070(2) 0.074(2) -0.0013(19) 0.026(2) 0.026(2)
 C(34) 0.065(2) 0.085(2) 0.081(2) -0.006(2) 0.021(2) 0.037(2)
 C(35) 0.067(2) 0.116(3) 0.083(2) -0.006(2) 0.017(2) 0.047(2)
 C(36) 0.074(2) 0.121(4) 0.104(3) 0.005(2) 0.022(2) 0.058(3)
 C(37) 0.051(2) 0.060(2) 0.065(2) 0.0050(17) 0.0204(17) 0.0222(17)
 C(38) 0.055(2) 0.076(2) 0.069(2) 0.0078(19) 0.0140(19) 0.022(2)
 C(39) 0.073(2) 0.063(2) 0.091(3) 0.013(2) 0.015(2) 0.026(2)
 C(40) 0.106(3) 0.079(3) 0.121(4) 0.025(2) 0.009(3) 0.026(2)
 C(41) 0.075(2) 0.073(2) 0.075(2) 0.013(2) 0.034(2) 0.040(2)
 C(42) 0.074(2) 0.091(3) 0.072(2) 0.017(2) 0.027(2) 0.038(2)
 C(43) 0.085(3) 0.160(5) 0.094(3) -0.002(3) 0.021(2) 0.071(3)
 C(44) 0.142(5) 0.159(5) 0.118(4) 0.025(4) 0.049(4) 0.086(4)
 C(45) 0.079(2) 0.080(2) 0.075(2) 0.027(2) 0.042(2) 0.030(2)
 C(46) 0.127(4) 0.084(3) 0.113(4) 0.031(3) 0.056(3) 0.026(2)
 C(47) 0.175(5) 0.081(3) 0.095(3) 0.045(3) 0.057(3) 0.037(2)
 C(48) 0.232(8) 0.124(5) 0.122(5) 0.054(5) 0.052(5) 0.043(4)

#==============================================================================

_computing_data_collection            'CrystalClear'
_computing_cell_refinement            'CrystalClear'
_computing_data_reduction             'CrystalStructure'
_computing_structure_solution         'SIR92'
_computing_structure_refinement       'CRYSTALS'
_computing_publication_material       'CrystalStructure 3.8'
_computing_molecular_graphics          ?

#==============================================================================

# MOLECULAR GEOMETRY

_geom_special_details
;
    ENTER SPECIAL DETAILS OF THE MOLECULAR GEOMETRY
;

loop_
_geom_bond_atom_site_label_1
_geom_bond_atom_site_label_2
_geom_bond_distance
_geom_bond_publ_flag
_geom_bond_site_symmetry_1
_geom_bond_site_symmetry_2
Se(1) C(4) 1.915(3) yes . .
Se(1) C(5) 1.904(4) yes . .
Se(2) C(4) 1.924(4) yes . .
Se(2) C(6) 1.854(4) yes . .
Se(3) C(12) 1.888(3) yes . .
Se(3) C(13) 1.892(4) yes . .
Se(4) C(12) 1.887(3) yes . .
Se(4) C(14) 1.881(4) yes . .
Ni(1) S(1) 2.1974(10) yes . .
Ni(1) S(2) 2.2163(11) yes . .
Ni(1) S(5) 2.2015(10) yes . .
Ni(1) S(6) 2.1994(8) yes . .
S(1) C(1) 1.747(4) yes . .
S(2) C(2) 1.729(3) yes . .
S(3) C(1) 1.765(3) yes . .
S(3) C(3) 1.753(4) yes . .
S(4) C(2) 1.789(4) yes . .
S(4) C(3) 1.774(3) yes . .
S(5) C(9) 1.732(3) yes . .
S(6) C(10) 1.722(3) yes . .
S(7) C(9) 1.754(3) yes . .
S(7) C(11) 1.767(3) yes . .
S(8) C(10) 1.764(3) yes . .
S(8) C(11) 1.752(3) yes . .
N(1) C(17) 1.519(3) yes . .
N(1) C(21) 1.518(4) yes . .
N(1) C(25) 1.527(5) yes . .
N(1) C(29) 1.532(5) yes . .
N(2) C(33) 1.514(4) yes . .
N(2) C(37) 1.516(4) yes . .
N(2) C(41) 1.515(5) yes . .
N(2) C(45) 1.517(5) yes . .
C(1) C(2) 1.330(5) yes . .
C(3) C(4) 1.284(5) yes . .
C(5) C(6) 1.312(6) yes . .
C(5) C(7) 1.591(6) yes . .
C(6) C(8) 1.542(6) yes . .
C(9) C(10) 1.365(4) yes . .
C(11) C(12) 1.356(5) yes . .
C(13) C(14) 1.353(6) yes . .
C(13) C(15) 1.502(6) yes . .
C(14) C(16) 1.509(6) yes . .
C(17) C(18) 1.506(6) yes . .
C(18) C(19) 1.516(4) yes . .
C(19) C(20) 1.471(8) yes . .
C(21) C(22) 1.483(7) yes . .
C(22) C(23) 1.601(7) yes . .
C(23) C(24) 1.312(12) yes . .
C(25) C(26) 1.522(4) yes . .
C(26) C(27) 1.488(7) yes . .
C(27) C(28) 1.486(6) yes . .
C(29) C(30) 1.500(5) yes . .
C(30) C(31) 1.529(6) yes . .
C(31) C(32) 1.521(6) yes . .
C(33) C(34) 1.508(6) yes . .
C(34) C(35) 1.499(5) yes . .
C(35) C(36) 1.509(7) yes . .
C(37) C(38) 1.498(5) yes . .
C(38) C(39) 1.530(5) yes . .
C(39) C(40) 1.526(6) yes . .
C(41) C(42) 1.514(4) yes . .
C(42) C(43) 1.515(8) yes . .
C(43) C(44) 1.468(6) yes . .
C(45) C(46) 1.502(6) yes . .
C(46) C(47) 1.597(9) yes . .
C(47) C(48) 1.365(7) yes . .
C(7) H(1) 0.950 no . .
C(7) H(2) 0.950 no . .
C(7) H(3) 0.950 no . .
C(8) H(4) 0.950 no . .
C(8) H(5) 0.950 no . .
C(8) H(6) 0.950 no . .
C(15) H(7) 0.950 no . .
C(15) H(8) 0.950 no . .
C(15) H(9) 0.950 no . .
C(16) H(10) 0.950 no . .
C(16) H(11) 0.950 no . .
C(16) H(12) 0.950 no . .
C(17) H(13) 0.950 no . .
C(17) H(14) 0.950 no . .
C(18) H(15) 0.950 no . .
C(18) H(16) 0.950 no . .
C(19) H(17) 0.950 no . .
C(19) H(18) 0.950 no . .
C(20) H(19) 0.950 no . .
C(20) H(20) 0.950 no . .
C(20) H(21) 0.950 no . .
C(21) H(22) 0.950 no . .
C(21) H(23) 0.950 no . .
C(22) H(24) 0.950 no . .
C(22) H(25) 0.950 no . .
C(23) H(26) 0.950 no . .
C(23) H(27) 0.950 no . .
C(24) H(28) 0.950 no . .
C(24) H(29) 0.950 no . .
C(24) H(30) 0.950 no . .
C(25) H(31) 0.950 no . .
C(25) H(32) 0.950 no . .
C(26) H(33) 0.950 no . .
C(26) H(34) 0.950 no . .
C(27) H(35) 0.950 no . .
C(27) H(36) 0.950 no . .
C(28) H(37) 0.950 no . .
C(28) H(38) 0.950 no . .
C(28) H(39) 0.950 no . .
C(29) H(40) 0.950 no . .
C(29) H(41) 0.950 no . .
C(30) H(42) 0.950 no . .
C(30) H(43) 0.950 no . .
C(31) H(44) 0.950 no . .
C(31) H(45) 0.950 no . .
C(32) H(46) 0.950 no . .
C(32) H(47) 0.950 no . .
C(32) H(48) 0.950 no . .
C(33) H(49) 0.950 no . .
C(33) H(50) 0.950 no . .
C(34) H(51) 0.950 no . .
C(34) H(52) 0.950 no . .
C(35) H(53) 0.950 no . .
C(35) H(54) 0.950 no . .
C(36) H(55) 0.950 no . .
C(36) H(56) 0.950 no . .
C(36) H(57) 0.950 no . .
C(37) H(58) 0.950 no . .
C(37) H(59) 0.950 no . .
C(38) H(60) 0.950 no . .
C(38) H(61) 0.950 no . .
C(39) H(62) 0.950 no . .
C(39) H(63) 0.950 no . .
C(40) H(64) 0.950 no . .
C(40) H(65) 0.950 no . .
C(40) H(66) 0.950 no . .
C(41) H(67) 0.950 no . .
C(41) H(68) 0.950 no . .
C(42) H(69) 0.950 no . .
C(42) H(70) 0.950 no . .
C(43) H(71) 0.950 no . .
C(43) H(72) 0.950 no . .
C(44) H(73) 0.950 no . .
C(44) H(74) 0.950 no . .
C(44) H(75) 0.950 no . .
C(45) H(76) 0.950 no . .
C(45) H(77) 0.950 no . .
C(46) H(78) 0.950 no . .
C(46) H(79) 0.950 no . .
C(47) H(80) 0.950 no . .
C(47) H(81) 0.950 no . .
C(48) H(82) 0.950 no . .
C(48) H(83) 0.950 no . .
C(48) H(84) 0.950 no . .

loop_
_geom_angle_atom_site_label_1
_geom_angle_atom_site_label_2
_geom_angle_atom_site_label_3
_geom_angle
_geom_angle_publ_flag
_geom_angle_site_symmetry_1
_geom_angle_site_symmetry_2
_geom_angle_site_symmetry_3
C(4) Se(1) C(5) 93.83(17) yes . . .
C(4) Se(2) C(6) 95.39(19) yes . . .
C(12) Se(3) C(13) 94.22(17) yes . . .
C(12) Se(4) C(14) 94.05(18) yes . . .
S(1) Ni(1) S(2) 92.20(4) yes . . .
S(1) Ni(1) S(5) 89.66(3) yes . . .
S(1) Ni(1) S(6) 170.20(4) yes . . .
S(2) Ni(1) S(5) 163.69(4) yes . . .
S(2) Ni(1) S(6) 87.86(3) yes . . .
S(5) Ni(1) S(6) 93.04(3) yes . . .
Ni(1) S(1) C(1) 101.04(13) yes . . .
Ni(1) S(2) C(2) 100.78(14) yes . . .
C(1) S(3) C(3) 95.24(17) yes . . .
C(2) S(4) C(3) 94.80(18) yes . . .
Ni(1) S(5) C(9) 100.78(12) yes . . .
Ni(1) S(6) C(10) 101.13(10) yes . . .
C(9) S(7) C(11) 95.79(18) yes . . .
C(10) S(8) C(11) 96.30(17) yes . . .
C(17) N(1) C(21) 111.4(2) yes . . .
C(17) N(1) C(25) 104.9(2) yes . . .
C(17) N(1) C(29) 112.0(2) yes . . .
C(21) N(1) C(25) 111.5(2) yes . . .
C(21) N(1) C(29) 105.3(2) yes . . .
C(25) N(1) C(29) 111.8(2) yes . . .
C(33) N(2) C(37) 111.6(2) yes . . .
C(33) N(2) C(41) 105.7(3) yes . . .
C(33) N(2) C(45) 112.2(2) yes . . .
C(37) N(2) C(41) 112.1(2) yes . . .
C(37) N(2) C(45) 104.3(3) yes . . .
C(41) N(2) C(45) 111.1(3) yes . . .
S(1) C(1) S(3) 120.6(2) yes . . .
S(1) C(1) C(2) 121.4(2) yes . . .
S(3) C(1) C(2) 118.0(3) yes . . .
S(2) C(2) S(4) 120.8(2) yes . . .
S(2) C(2) C(1) 122.8(3) yes . . .
S(4) C(2) C(1) 116.2(2) yes . . .
S(3) C(3) S(4) 113.5(2) yes . . .
S(3) C(3) C(4) 123.0(3) yes . . .
S(4) C(3) C(4) 123.6(3) yes . . .
Se(1) C(4) Se(2) 111.39(18) yes . . .
Se(1) C(4) C(3) 123.1(3) yes . . .
Se(2) C(4) C(3) 125.5(3) yes . . .
Se(1) C(5) C(6) 119.9(3) yes . . .
Se(1) C(5) C(7) 112.6(3) yes . . .
C(6) C(5) C(7) 127.4(4) yes . . .
Se(2) C(6) C(5) 119.4(3) yes . . .
Se(2) C(6) C(8) 118.4(3) yes . . .
C(5) C(6) C(8) 122.2(4) yes . . .
S(5) C(9) S(7) 120.67(19) yes . . .
S(5) C(9) C(10) 122.0(2) yes . . .
S(7) C(9) C(10) 117.3(2) yes . . .
S(6) C(10) S(8) 121.83(19) yes . . .
S(6) C(10) C(9) 121.9(2) yes . . .
S(8) C(10) C(9) 116.2(2) yes . . .
S(7) C(11) S(8) 113.9(2) yes . . .
S(7) C(11) C(12) 121.9(2) yes . . .
S(8) C(11) C(12) 124.2(2) yes . . .
Se(3) C(12) Se(4) 114.2(2) yes . . .
Se(3) C(12) C(11) 122.4(2) yes . . .
Se(4) C(12) C(11) 123.4(2) yes . . .
Se(3) C(13) C(14) 118.2(3) yes . . .
Se(3) C(13) C(15) 114.6(3) yes . . .
C(14) C(13) C(15) 127.1(4) yes . . .
Se(4) C(14) C(13) 119.4(3) yes . . .
Se(4) C(14) C(16) 115.6(3) yes . . .
C(13) C(14) C(16) 124.9(4) yes . . .
N(1) C(17) C(18) 116.3(3) yes . . .
C(17) C(18) C(19) 107.4(3) yes . . .
C(18) C(19) C(20) 114.2(4) yes . . .
N(1) C(21) C(22) 115.9(3) yes . . .
C(21) C(22) C(23) 105.3(4) yes . . .
C(22) C(23) C(24) 111.2(6) yes . . .
N(1) C(25) C(26) 115.6(3) yes . . .
C(25) C(26) C(27) 110.4(3) yes . . .
C(26) C(27) C(28) 116.4(4) yes . . .
N(1) C(29) C(30) 116.0(3) yes . . .
C(29) C(30) C(31) 109.7(3) yes . . .
C(30) C(31) C(32) 113.1(3) yes . . .
N(2) C(33) C(34) 116.0(3) yes . . .
C(33) C(34) C(35) 111.6(4) yes . . .
C(34) C(35) C(36) 114.2(4) yes . . .
N(2) C(37) C(38) 116.0(3) yes . . .
C(37) C(38) C(39) 109.2(3) yes . . .
C(38) C(39) C(40) 112.7(4) yes . . .
N(2) C(41) C(42) 117.5(3) yes . . .
C(41) C(42) C(43) 110.0(3) yes . . .
C(42) C(43) C(44) 113.4(5) yes . . .
N(2) C(45) C(46) 116.7(4) yes . . .
C(45) C(46) C(47) 108.0(4) yes . . .
C(46) C(47) C(48) 114.0(5) yes . . .
C(5) C(7) H(1) 109.4 no . . .
C(5) C(7) H(2) 110.1 no . . .
C(5) C(7) H(3) 108.9 no . . .
H(1) C(7) H(2) 109.5 no . . .
H(1) C(7) H(3) 109.5 no . . .
H(2) C(7) H(3) 109.5 no . . .
C(6) C(8) H(4) 109.5 no . . .
C(6) C(8) H(5) 110.3 no . . .
C(6) C(8) H(6) 108.6 no . . .
H(4) C(8) H(5) 109.5 no . . .
H(4) C(8) H(6) 109.5 no . . .
H(5) C(8) H(6) 109.5 no . . .
C(13) C(15) H(7) 109.4 no . . .
C(13) C(15) H(8) 109.6 no . . .
C(13) C(15) H(9) 109.4 no . . .
H(7) C(15) H(8) 109.5 no . . .
H(7) C(15) H(9) 109.5 no . . .
H(8) C(15) H(9) 109.5 no . . .
C(14) C(16) H(10) 109.3 no . . .
C(14) C(16) H(11) 110.6 no . . .
C(14) C(16) H(12) 108.5 no . . .
H(10) C(16) H(11) 109.5 no . . .
H(10) C(16) H(12) 109.5 no . . .
H(11) C(16) H(12) 109.5 no . . .
N(1) C(17) H(13) 108.0 no . . .
N(1) C(17) H(14) 108.3 no . . .
C(18) C(17) H(13) 107.7 no . . .
C(18) C(17) H(14) 107.0 no . . .
H(13) C(17) H(14) 109.5 no . . .
C(17) C(18) H(15) 110.1 no . . .
C(17) C(18) H(16) 109.7 no . . .
C(19) C(18) H(15) 110.6 no . . .
C(19) C(18) H(16) 109.5 no . . .
H(15) C(18) H(16) 109.5 no . . .
C(18) C(19) H(17) 108.5 no . . .
C(18) C(19) H(18) 107.6 no . . .
C(20) C(19) H(17) 109.1 no . . .
C(20) C(19) H(18) 107.9 no . . .
H(17) C(19) H(18) 109.5 no . . .
C(19) C(20) H(19) 110.2 no . . .
C(19) C(20) H(20) 110.2 no . . .
C(19) C(20) H(21) 108.0 no . . .
H(19) C(20) H(20) 109.5 no . . .
H(19) C(20) H(21) 109.5 no . . .
H(20) C(20) H(21) 109.5 no . . .
N(1) C(21) H(22) 108.0 no . . .
N(1) C(21) H(23) 107.9 no . . .
C(22) C(21) H(22) 107.5 no . . .
C(22) C(21) H(23) 107.9 no . . .
H(22) C(21) H(23) 109.5 no . . .
C(21) C(22) H(24) 110.2 no . . .
C(21) C(22) H(25) 110.5 no . . .
C(23) C(22) H(24) 110.8 no . . .
C(23) C(22) H(25) 110.5 no . . .
H(24) C(22) H(25) 109.5 no . . .
C(22) C(23) H(26) 109.0 no . . .
C(22) C(23) H(27) 108.9 no . . .
C(24) C(23) H(26) 110.9 no . . .
C(24) C(23) H(27) 107.3 no . . .
H(26) C(23) H(27) 109.5 no . . .
C(23) C(24) H(28) 111.6 no . . .
C(23) C(24) H(29) 108.8 no . . .
C(23) C(24) H(30) 108.0 no . . .
H(28) C(24) H(29) 109.5 no . . .
H(28) C(24) H(30) 109.5 no . . .
H(29) C(24) H(30) 109.5 no . . .
N(1) C(25) H(31) 108.2 no . . .
N(1) C(25) H(32) 108.2 no . . .
C(26) C(25) H(31) 107.9 no . . .
C(26) C(25) H(32) 107.4 no . . .
H(31) C(25) H(32) 109.5 no . . .
C(25) C(26) H(33) 109.5 no . . .
C(25) C(26) H(34) 109.1 no . . .
C(27) C(26) H(33) 109.1 no . . .
C(27) C(26) H(34) 109.3 no . . .
H(33) C(26) H(34) 109.5 no . . .
C(26) C(27) H(35) 107.6 no . . .
C(26) C(27) H(36) 107.3 no . . .
C(28) C(27) H(35) 107.5 no . . .
C(28) C(27) H(36) 108.5 no . . .
H(35) C(27) H(36) 109.5 no . . .
C(27) C(28) H(37) 108.9 no . . .
C(27) C(28) H(38) 110.5 no . . .
C(27) C(28) H(39) 109.0 no . . .
H(37) C(28) H(38) 109.5 no . . .
H(37) C(28) H(39) 109.5 no . . .
H(38) C(28) H(39) 109.5 no . . .
N(1) C(29) H(40) 108.6 no . . .
N(1) C(29) H(41) 107.9 no . . .
C(30) C(29) H(40) 107.9 no . . .
C(30) C(29) H(41) 106.8 no . . .
H(40) C(29) H(41) 109.5 no . . .
C(29) C(30) H(42) 109.7 no . . .
C(29) C(30) H(43) 108.6 no . . .
C(31) C(30) H(42) 109.8 no . . .
C(31) C(30) H(43) 109.6 no . . .
H(42) C(30) H(43) 109.5 no . . .
C(30) C(31) H(44) 108.8 no . . .
C(30) C(31) H(45) 108.5 no . . .
C(32) C(31) H(44) 108.5 no . . .
C(32) C(31) H(45) 108.3 no . . .
H(44) C(31) H(45) 109.5 no . . .
C(31) C(32) H(46) 109.6 no . . .
C(31) C(32) H(47) 110.5 no . . .
C(31) C(32) H(48) 108.3 no . . .
H(46) C(32) H(47) 109.5 no . . .
H(46) C(32) H(48) 109.5 no . . .
H(47) C(32) H(48) 109.5 no . . .
N(2) C(33) H(49) 108.1 no . . .
N(2) C(33) H(50) 108.5 no . . .
C(34) C(33) H(49) 107.3 no . . .
C(34) C(33) H(50) 107.3 no . . .
H(49) C(33) H(50) 109.5 no . . .
C(33) C(34) H(51) 108.8 no . . .
C(33) C(34) H(52) 108.9 no . . .
C(35) C(34) H(51) 108.9 no . . .
C(35) C(34) H(52) 109.2 no . . .
H(51) C(34) H(52) 109.5 no . . .
C(34) C(35) H(53) 108.2 no . . .
C(34) C(35) H(54) 108.1 no . . .
C(36) C(35) H(53) 107.7 no . . .
C(36) C(35) H(54) 109.2 no . . .
H(53) C(35) H(54) 109.5 no . . .
C(35) C(36) H(55) 108.6 no . . .
C(35) C(36) H(56) 110.8 no . . .
C(35) C(36) H(57) 109.0 no . . .
H(55) C(36) H(56) 109.5 no . . .
H(55) C(36) H(57) 109.5 no . . .
H(56) C(36) H(57) 109.5 no . . .
N(2) C(37) H(58) 108.6 no . . .
N(2) C(37) H(59) 107.7 no . . .
C(38) C(37) H(58) 108.1 no . . .
C(38) C(37) H(59) 107.0 no . . .
H(58) C(37) H(59) 109.5 no . . .
C(37) C(38) H(60) 110.2 no . . .
C(37) C(38) H(61) 108.8 no . . .
C(39) C(38) H(60) 110.1 no . . .
C(39) C(38) H(61) 109.1 no . . .
H(60) C(38) H(61) 109.5 no . . .
C(38) C(39) H(62) 109.3 no . . .
C(38) C(39) H(63) 108.1 no . . .
C(40) C(39) H(62) 109.3 no . . .
C(40) C(39) H(63) 107.9 no . . .
H(62) C(39) H(63) 109.5 no . . .
C(39) C(40) H(64) 110.3 no . . .
C(39) C(40) H(65) 110.9 no . . .
C(39) C(40) H(66) 107.3 no . . .
H(64) C(40) H(65) 109.5 no . . .
H(64) C(40) H(66) 109.5 no . . .
H(65) C(40) H(66) 109.5 no . . .
N(2) C(41) H(67) 107.7 no . . .
N(2) C(41) H(68) 107.8 no . . .
C(42) C(41) H(67) 107.2 no . . .
C(42) C(41) H(68) 107.1 no . . .
H(67) C(41) H(68) 109.5 no . . .
C(41) C(42) H(69) 109.1 no . . .
C(41) C(42) H(70) 109.4 no . . .
C(43) C(42) H(69) 110.2 no . . .
C(43) C(42) H(70) 108.7 no . . .
H(69) C(42) H(70) 109.5 no . . .
C(42) C(43) H(71) 109.2 no . . .
C(42) C(43) H(72) 107.8 no . . .
C(44) C(43) H(71) 109.2 no . . .
C(44) C(43) H(72) 107.8 no . . .
H(71) C(43) H(72) 109.5 no . . .
C(43) C(44) H(73) 110.3 no . . .
C(43) C(44) H(74) 110.1 no . . .
C(43) C(44) H(75) 108.0 no . . .
H(73) C(44) H(74) 109.5 no . . .
H(73) C(44) H(75) 109.5 no . . .
H(74) C(44) H(75) 109.5 no . . .
N(2) C(45) H(76) 108.1 no . . .
N(2) C(45) H(77) 107.9 no . . .
C(46) C(45) H(76) 107.2 no . . .
C(46) C(45) H(77) 107.4 no . . .
H(76) C(45) H(77) 109.5 no . . .
C(45) C(46) H(78) 109.2 no . . .
C(45) C(46) H(79) 110.2 no . . .
C(47) C(46) H(78) 109.8 no . . .
C(47) C(46) H(79) 110.2 no . . .
H(78) C(46) H(79) 109.5 no . . .
C(46) C(47) H(80) 107.6 no . . .
C(46) C(47) H(81) 108.2 no . . .
C(48) C(47) H(80) 109.0 no . . .
C(48) C(47) H(81) 108.6 no . . .
H(80) C(47) H(81) 109.5 no . . .
C(47) C(48) H(82) 109.7 no . . .
C(47) C(48) H(83) 109.3 no . . .
C(47) C(48) H(84) 109.4 no . . .
H(82) C(48) H(83) 109.5 no . . .
H(82) C(48) H(84) 109.5 no . . .
H(83) C(48) H(84) 109.5 no . . .

loop_
_geom_torsion_atom_site_label_1
_geom_torsion_atom_site_label_2
_geom_torsion_atom_site_label_3
_geom_torsion_atom_site_label_4
_geom_torsion
_geom_torsion_publ_flag
_geom_torsion_site_symmetry_1
_geom_torsion_site_symmetry_2
_geom_torsion_site_symmetry_3
_geom_torsion_site_symmetry_4
C(4) Se(1) C(5) C(6) 1.2(4) ? . . . .
C(4) Se(1) C(5) C(7) -176.1(3) ? . . . .
C(5) Se(1) C(4) Se(2) -2.7(2) ? . . . .
C(5) Se(1) C(4) C(3) 177.2(4) ? . . . .
C(4) Se(2) C(6) C(5) -2.6(4) ? . . . .
C(4) Se(2) C(6) C(8) 176.7(3) ? . . . .
C(6) Se(2) C(4) Se(1) 3.2(2) ? . . . .
C(6) Se(2) C(4) C(3) -176.8(4) ? . . . .
C(12) Se(3) C(13) C(14) 0.3(4) ? . . . .
C(12) Se(3) C(13) C(15) 176.6(3) ? . . . .
C(13) Se(3) C(12) Se(4) 0.0(2) ? . . . .
C(13) Se(3) C(12) C(11) -178.7(3) ? . . . .
C(12) Se(4) C(14) C(13) 0.4(4) ? . . . .
C(12) Se(4) C(14) C(16) -177.5(3) ? . . . .
C(14) Se(4) C(12) Se(3) -0.2(2) ? . . . .
C(14) Se(4) C(12) C(11) 178.5(3) ? . . . .
S(1) Ni(1) S(2) C(2) -9.85(15) ? . . . .
S(2) Ni(1) S(1) C(1) 11.50(14) ? . . . .
S(1) Ni(1) S(5) C(9) -179.45(15) ? . . . .
S(5) Ni(1) S(1) C(1) -152.29(13) ? . . . .
S(1) Ni(1) S(6) C(10) 114.9(2) ? . . . .
S(6) Ni(1) S(1) C(1) 101.7(3) ? . . . .
S(2) Ni(1) S(5) C(9) 83.87(19) ? . . . .
S(5) Ni(1) S(2) C(2) 86.5(2) ? . . . .
S(2) Ni(1) S(6) C(10) -154.56(15) ? . . . .
S(6) Ni(1) S(2) C(2) 179.96(9) ? . . . .
S(5) Ni(1) S(6) C(10) 9.13(15) ? . . . .
S(6) Ni(1) S(5) C(9) -8.88(15) ? . . . .
Ni(1) S(1) C(1) S(3) 167.5(2) ? . . . .
Ni(1) S(1) C(1) C(2) -11.9(3) ? . . . .
Ni(1) S(2) C(2) S(4) -169.1(2) ? . . . .
Ni(1) S(2) C(2) C(1) 5.5(4) ? . . . .
C(1) S(3) C(3) S(4) 14.8(2) ? . . . .
C(1) S(3) C(3) C(4) -165.9(4) ? . . . .
C(3) S(3) C(1) S(1) 171.5(2) ? . . . .
C(3) S(3) C(1) C(2) -9.1(3) ? . . . .
C(2) S(4) C(3) S(3) -14.7(2) ? . . . .
C(2) S(4) C(3) C(4) 165.9(4) ? . . . .
C(3) S(4) C(2) S(2) -176.1(2) ? . . . .
C(3) S(4) C(2) C(1) 8.9(3) ? . . . .
Ni(1) S(5) C(9) S(7) -171.6(2) ? . . . .
Ni(1) S(5) C(9) C(10) 6.9(3) ? . . . .
Ni(1) S(6) C(10) S(8) 169.4(2) ? . . . .
Ni(1) S(6) C(10) C(9) -7.7(3) ? . . . .
C(9) S(7) C(11) S(8) 7.4(2) ? . . . .
C(9) S(7) C(11) C(12) -173.5(3) ? . . . .
C(11) S(7) C(9) S(5) 172.9(2) ? . . . .
C(11) S(7) C(9) C(10) -5.6(3) ? . . . .
C(10) S(8) C(11) S(7) -6.6(2) ? . . . .
C(10) S(8) C(11) C(12) 174.3(4) ? . . . .
C(11) S(8) C(10) S(6) -174.3(2) ? . . . .
C(11) S(8) C(10) C(9) 3.0(3) ? . . . .
C(17) N(1) C(21) C(22) 61.1(4) ? . . . .
C(21) N(1) C(17) C(18) 63.1(4) ? . . . .
C(17) N(1) C(25) C(26) 179.6(3) ? . . . .
C(25) N(1) C(17) C(18) -176.1(3) ? . . . .
C(17) N(1) C(29) C(30) -58.2(4) ? . . . .
C(29) N(1) C(17) C(18) -54.6(4) ? . . . .
C(21) N(1) C(25) C(26) -59.7(4) ? . . . .
C(25) N(1) C(21) C(22) -55.7(4) ? . . . .
C(21) N(1) C(29) C(30) -179.5(3) ? . . . .
C(29) N(1) C(21) C(22) -177.2(3) ? . . . .
C(25) N(1) C(29) C(30) 59.2(3) ? . . . .
C(29) N(1) C(25) C(26) 58.0(3) ? . . . .
C(33) N(2) C(37) C(38) 56.1(4) ? . . . .
C(37) N(2) C(33) C(34) 54.1(4) ? . . . .
C(33) N(2) C(41) C(42) 179.9(2) ? . . . .
C(41) N(2) C(33) C(34) 176.2(3) ? . . . .
C(33) N(2) C(45) C(46) -61.4(4) ? . . . .
C(45) N(2) C(33) C(34) -62.5(4) ? . . . .
C(37) N(2) C(41) C(42) -58.2(4) ? . . . .
C(41) N(2) C(37) C(38) -62.3(3) ? . . . .
C(37) N(2) C(45) C(46) 177.7(3) ? . . . .
C(45) N(2) C(37) C(38) 177.4(2) ? . . . .
C(41) N(2) C(45) C(46) 56.8(3) ? . . . .
C(45) N(2) C(41) C(42) 58.0(3) ? . . . .
S(1) C(1) C(2) S(2) 4.6(5) ? . . . .
S(1) C(1) C(2) S(4) 179.4(2) ? . . . .
S(3) C(1) C(2) S(2) -174.8(2) ? . . . .
S(3) C(1) C(2) S(4) 0.0(4) ? . . . .
S(3) C(3) C(4) Se(1) -1.9(5) ? . . . .
S(3) C(3) C(4) Se(2) 178.1(2) ? . . . .
S(4) C(3) C(4) Se(1) 177.4(2) ? . . . .
S(4) C(3) C(4) Se(2) -2.6(6) ? . . . .
Se(1) C(5) C(6) Se(2) 1.0(5) ? . . . .
Se(1) C(5) C(6) C(8) -178.3(3) ? . . . .
C(7) C(5) C(6) Se(2) 177.8(3) ? . . . .
C(7) C(5) C(6) C(8) -1.5(7) ? . . . .
S(5) C(9) C(10) S(6) 0.6(5) ? . . . .
S(5) C(9) C(10) S(8) -176.7(2) ? . . . .
S(7) C(9) C(10) S(6) 179.1(2) ? . . . .
S(7) C(9) C(10) S(8) 1.8(4) ? . . . .
S(7) C(11) C(12) Se(3) -2.6(5) ? . . . .
S(7) C(11) C(12) Se(4) 178.9(2) ? . . . .
S(8) C(11) C(12) Se(3) 176.4(2) ? . . . .
S(8) C(11) C(12) Se(4) -2.1(5) ? . . . .
Se(3) C(13) C(14) Se(4) -0.5(5) ? . . . .
Se(3) C(13) C(14) C(16) 177.2(4) ? . . . .
C(15) C(13) C(14) Se(4) -176.3(4) ? . . . .
C(15) C(13) C(14) C(16) 1.4(8) ? . . . .
N(1) C(17) C(18) C(19) -177.1(3) ? . . . .
C(17) C(18) C(19) C(20) -177.9(3) ? . . . .
N(1) C(21) C(22) C(23) 179.7(3) ? . . . .
C(21) C(22) C(23) C(24) -171.7(5) ? . . . .
N(1) C(25) C(26) C(27) -179.7(3) ? . . . .
C(25) C(26) C(27) C(28) 173.3(3) ? . . . .
N(1) C(29) C(30) C(31) 179.2(3) ? . . . .
C(29) C(30) C(31) C(32) 176.9(3) ? . . . .
N(2) C(33) C(34) C(35) -179.9(3) ? . . . .
C(33) C(34) C(35) C(36) 171.5(3) ? . . . .
N(2) C(37) C(38) C(39) 175.6(3) ? . . . .
C(37) C(38) C(39) C(40) 178.3(3) ? . . . .
N(2) C(41) C(42) C(43) -172.7(3) ? . . . .
C(41) C(42) C(43) C(44) -176.6(4) ? . . . .
N(2) C(45) C(46) C(47) -168.6(3) ? . . . .
C(45) C(46) C(47) C(48) -178.8(4) ? . . . .

loop_
_geom_contact_atom_site_label_1
_geom_contact_atom_site_label_2
_geom_contact_distance
_geom_contact_publ_flag
_geom_contact_site_symmetry_1
_geom_contact_site_symmetry_2
Se(1) Se(2) 3.1711(6) ? . .
Se(1) S(3) 3.2879(11) ? . .
Se(1) C(3) 2.829(3) ? . .
Se(1) C(6) 2.799(4) ? . .
Se(1) C(7) 2.913(4) ? . .
Se(2) Se(1) 3.1711(6) ? . .
Se(2) S(4) 3.3837(11) ? . .
Se(2) C(3) 2.867(4) ? . .
Se(2) C(5) 2.747(4) ? . .
Se(2) C(8) 2.922(5) ? . .
Se(3) Se(4) 3.1693(6) ? . .
Se(3) S(7) 3.3045(13) ? . .
Se(3) C(11) 2.856(3) ? . .
Se(3) C(14) 2.797(4) ? . .
Se(3) C(15) 2.864(5) ? . .
Se(4) Se(3) 3.1693(6) ? . .
Se(4) S(8) 3.3829(13) ? . .
Se(4) C(11) 2.866(4) ? . .
Se(4) C(13) 2.805(4) ? . .
Se(4) C(16) 2.876(5) ? . .
Ni(1) C(1) 3.058(3) ? . .
Ni(1) C(2) 3.055(3) ? . .
Ni(1) C(9) 3.045(3) ? . .
Ni(1) C(10) 3.044(3) ? . .
S(1) S(2) 3.1804(15) ? . .
S(1) S(3) 3.0512(14) ? . .
S(1) S(5) 3.1011(14) ? . .
S(1) C(2) 2.691(4) ? . .
S(1) C(26) 3.579(4) ? . .
S(2) S(1) 3.1804(15) ? . .
S(2) S(4) 3.0585(13) ? . .
S(2) S(6) 3.0634(13) ? . .
S(2) C(1) 2.693(3) ? . .
S(3) Se(1) 3.2879(11) ? . .
S(3) S(1) 3.0512(14) ? . .
S(3) S(4) 2.9483(15) ? . .
S(3) C(2) 2.662(3) ? . .
S(3) C(4) 2.678(4) ? . .
S(4) Se(2) 3.3837(11) ? . .
S(4) S(2) 3.0585(13) ? . .
S(4) S(3) 2.9483(15) ? . .
S(4) C(1) 2.659(4) ? . .
S(4) C(4) 2.705(3) ? . .
S(5) S(1) 3.1011(14) ? . .
S(5) S(6) 3.1933(11) ? . .
S(5) S(7) 3.0287(15) ? . .
S(5) C(10) 2.714(3) ? . .
S(6) S(2) 3.0634(13) ? . .
S(6) S(5) 3.1933(11) ? . .
S(6) S(8) 3.0468(14) ? . .
S(6) C(9) 2.704(3) ? . .
S(7) Se(3) 3.3045(13) ? . .
S(7) S(5) 3.0287(15) ? . .
S(7) S(8) 2.9489(13) ? . .
S(7) C(10) 2.671(3) ? . .
S(7) C(12) 2.737(3) ? . .
S(8) Se(4) 3.3829(13) ? . .
S(8) S(6) 3.0468(14) ? . .
S(8) S(7) 2.9489(13) ? . .
S(8) C(9) 2.665(3) ? . .
S(8) C(12) 2.754(4) ? . .
N(1) C(18) 2.571(4) ? . .
N(1) C(22) 2.544(6) ? . .
N(1) C(26) 2.579(5) ? . .
N(1) C(30) 2.571(5) ? . .
N(2) C(34) 2.564(4) ? . .
N(2) C(38) 2.556(4) ? . .
N(2) C(42) 2.589(5) ? . .
N(2) C(46) 2.569(5) ? . .
C(1) Ni(1) 3.058(3) ? . .
C(1) S(2) 2.693(3) ? . .
C(1) S(4) 2.659(4) ? . .
C(1) C(3) 2.599(5) ? . .
C(1) C(7) 3.444(6) ? . 2_655
C(2) Ni(1) 3.055(3) ? . .
C(2) S(1) 2.691(4) ? . .
C(2) S(3) 2.662(3) ? . .
C(2) C(3) 2.622(4) ? . .
C(2) C(7) 3.527(7) ? . 2_655
C(3) Se(1) 2.829(3) ? . .
C(3) Se(2) 2.867(4) ? . .
C(3) C(1) 2.599(5) ? . .
C(3) C(2) 2.622(4) ? . .
C(4) S(3) 2.678(4) ? . .
C(4) S(4) 2.705(3) ? . .
C(4) C(5) 2.789(5) ? . .
C(4) C(6) 2.794(5) ? . .
C(5) Se(2) 2.747(4) ? . .
C(5) C(4) 2.789(5) ? . .
C(5) C(8) 2.501(7) ? . .
C(6) Se(1) 2.799(4) ? . .
C(6) C(4) 2.794(5) ? . .
C(6) C(7) 2.606(6) ? . .
C(7) Se(1) 2.913(4) ? . .
C(7) C(1) 3.444(6) ? . 2_655
C(7) C(2) 3.527(7) ? . 2_655
C(7) C(6) 2.606(6) ? . .
C(7) C(8) 3.101(7) ? . .
C(8) Se(2) 2.922(5) ? . .
C(8) C(5) 2.501(7) ? . .
C(8) C(7) 3.101(7) ? . .
C(9) Ni(1) 3.045(3) ? . .
C(9) S(6) 2.704(3) ? . .
C(9) S(8) 2.665(3) ? . .
C(9) C(11) 2.612(5) ? . .
C(10) Ni(1) 3.044(3) ? . .
C(10) S(5) 2.714(3) ? . .
C(10) S(7) 2.671(3) ? . .
C(10) C(11) 2.619(5) ? . .
C(11) Se(3) 2.856(3) ? . .
C(11) Se(4) 2.866(4) ? . .
C(11) C(9) 2.612(5) ? . .
C(11) C(10) 2.619(5) ? . .
C(12) S(7) 2.737(3) ? . .
C(12) S(8) 2.754(4) ? . .
C(12) C(13) 2.770(6) ? . .
C(12) C(14) 2.757(6) ? . .
C(13) Se(4) 2.805(4) ? . .
C(13) C(12) 2.770(6) ? . .
C(13) C(16) 2.539(6) ? . .
C(14) Se(3) 2.797(4) ? . .
C(14) C(12) 2.757(6) ? . .
C(14) C(15) 2.557(6) ? . .
C(15) Se(3) 2.864(5) ? . .
C(15) C(14) 2.557(6) ? . .
C(15) C(16) 3.124(6) ? . .
C(16) Se(4) 2.876(5) ? . .
C(16) C(13) 2.539(6) ? . .
C(16) C(15) 3.124(6) ? . .
C(17) C(19) 2.435(5) ? . .
C(17) C(21) 2.510(4) ? . .
C(17) C(22) 3.060(5) ? . .
C(17) C(25) 2.415(5) ? . .
C(17) C(29) 2.530(4) ? . .
C(17) C(30) 3.068(5) ? . .
C(18) N(1) 2.571(4) ? . .
C(18) C(20) 2.508(5) ? . .
C(18) C(21) 3.101(4) ? . .
C(18) C(29) 3.040(4) ? . .
C(18) C(30) 3.586(5) ? . .
C(19) C(17) 2.435(5) ? . .
C(20) C(18) 2.508(5) ? . .
C(21) C(17) 2.510(4) ? . .
C(21) C(18) 3.101(4) ? . .
C(21) C(23) 2.454(7) ? . .
C(21) C(25) 2.518(5) ? . .
C(21) C(26) 3.071(6) ? . .
C(21) C(29) 2.425(5) ? . .
C(22) N(1) 2.544(6) ? . .
C(22) C(17) 3.060(5) ? . .
C(22) C(24) 2.409(9) ? . .
C(22) C(25) 3.016(6) ? . .
C(23) C(21) 2.454(7) ? . .
C(24) C(22) 2.409(9) ? . .
C(25) C(17) 2.415(5) ? . .
C(25) C(21) 2.518(5) ? . .
C(25) C(22) 3.016(6) ? . .
C(25) C(27) 2.471(6) ? . .
C(25) C(29) 2.533(6) ? . .
C(25) C(30) 3.077(6) ? . .
C(26) S(1) 3.579(4) ? . .
C(26) N(1) 2.579(5) ? . .
C(26) C(21) 3.071(6) ? . .
C(26) C(28) 2.527(7) ? . .
C(26) C(29) 3.068(6) ? . .
C(27) C(25) 2.471(6) ? . .
C(28) C(26) 2.527(7) ? . .
C(29) C(17) 2.530(4) ? . .
C(29) C(18) 3.040(4) ? . .
C(29) C(21) 2.425(5) ? . .
C(29) C(25) 2.533(6) ? . .
C(29) C(26) 3.068(6) ? . .
C(29) C(31) 2.476(5) ? . .
C(30) N(1) 2.571(5) ? . .
C(30) C(17) 3.068(5) ? . .
C(30) C(18) 3.586(5) ? . .
C(30) C(25) 3.077(6) ? . .
C(30) C(32) 2.545(6) ? . .
C(31) C(29) 2.476(5) ? . .
C(32) C(30) 2.545(6) ? . .
C(33) C(35) 2.486(5) ? . .
C(33) C(37) 2.506(4) ? . .
C(33) C(38) 3.023(4) ? . .
C(33) C(41) 2.415(5) ? . .
C(33) C(45) 2.516(5) ? . .
C(33) C(46) 3.098(6) ? . .
C(34) N(2) 2.564(4) ? . .
C(34) C(36) 2.525(5) ? . .
C(34) C(37) 3.010(4) ? . .
C(34) C(38) 3.515(4) ? . .
C(34) C(45) 3.100(5) ? . .
C(35) C(33) 2.486(5) ? . .
C(36) C(34) 2.525(5) ? . .
C(37) C(33) 2.506(4) ? . .
C(37) C(34) 3.010(4) ? . .
C(37) C(39) 2.468(5) ? . .
C(37) C(41) 2.513(6) ? . .
C(37) C(42) 3.088(6) ? . .
C(37) C(45) 2.394(5) ? . .
C(38) N(2) 2.556(4) ? . .
C(38) C(33) 3.023(4) ? . .
C(38) C(34) 3.515(4) ? . .
C(38) C(40) 2.545(5) ? . .
C(38) C(41) 3.089(6) ? . .
C(39) C(37) 2.468(5) ? . .
C(40) C(38) 2.545(5) ? . .
C(41) C(33) 2.415(5) ? . .
C(41) C(37) 2.513(6) ? . .
C(41) C(38) 3.089(6) ? . .
C(41) C(43) 2.481(6) ? . .
C(41) C(45) 2.501(6) ? . .
C(41) C(46) 3.035(6) ? . .
C(42) N(2) 2.589(5) ? . .
C(42) C(37) 3.088(6) ? . .
C(42) C(44) 2.492(7) ? . .
C(42) C(45) 3.068(6) ? . .
C(43) C(41) 2.481(6) ? . .
C(44) C(42) 2.492(7) ? . .
C(45) C(33) 2.516(5) ? . .
C(45) C(34) 3.100(5) ? . .
C(45) C(37) 2.394(5) ? . .
C(45) C(41) 2.501(6) ? . .
C(45) C(42) 3.068(6) ? . .
C(45) C(47) 2.508(6) ? . .
C(46) N(2) 2.569(5) ? . .
C(46) C(33) 3.098(6) ? . .
C(46) C(41) 3.035(6) ? . .
C(46) C(48) 2.487(8) ? . .
C(47) C(45) 2.508(6) ? . .
C(48) C(46) 2.487(8) ? . .
Se(1) H(1) 3.296 ? . .
Se(1) H(3) 2.842 ? . .
Se(1) H(31) 3.132 ? . 2_555
Se(1) H(35) 3.557 ? . 2_555
Se(1) H(46) 3.324 ? . .
Se(1) H(66) 3.537 ? . 1_544
Se(2) H(4) 3.309 ? . .
Se(2) H(6) 2.893 ? . .
Se(2) H(14) 3.090 ? . 2_555
Se(2) H(18) 3.358 ? . 2_555
Se(3) H(7) 3.249 ? . .
Se(3) H(9) 2.806 ? . .
Se(3) H(12) 3.476 ? . 2_576
Se(3) H(44) 3.261 ? . 2_565
Se(3) H(47) 3.250 ? . 2_565
Se(3) H(68) 3.223 ? . 2_566
Se(4) H(7) 3.523 ? . 2_576
Se(4) H(10) 3.255 ? . .
Se(4) H(12) 2.815 ? . .
Se(4) H(49) 3.280 ? . 2_566
Se(4) H(53) 3.548 ? . 2_566
Se(4) H(64) 3.137 ? . .
Ni(1) H(39) 3.359 ? . .
Ni(1) H(57) 3.543 ? . .
Ni(1) H(69) 3.574 ? . 2_666
Ni(1) H(75) 3.206 ? . 2_666
S(1) H(2) 3.153 ? . 2_655
S(1) H(4) 3.437 ? . 2_655
S(1) H(27) 3.523 ? . 2_565
S(1) H(33) 2.812 ? . .
S(1) H(34) 3.513 ? . .
S(1) H(41) 2.910 ? . .
S(1) H(45) 3.460 ? . .
S(1) H(75) 3.061 ? . 2_666
S(2) H(39) 3.258 ? . .
S(2) H(52) 3.426 ? . .
S(2) H(58) 3.021 ? . 2_666
S(2) H(62) 3.440 ? . 2_666
S(2) H(70) 3.377 ? . 2_666
S(2) H(76) 3.026 ? . .
S(2) H(80) 2.935 ? . .
S(3) H(2) 3.399 ? . 2_655
S(3) H(4) 3.310 ? . 2_655
S(3) H(33) 3.327 ? . .
S(3) H(42) 3.415 ? . .
S(3) H(45) 3.028 ? . .
S(3) H(46) 3.097 ? . .
S(4) H(3) 3.335 ? . 2_655
S(4) H(37) 3.309 ? . .
S(4) H(62) 3.048 ? . 2_666
S(4) H(80) 3.267 ? . .
S(4) H(83) 3.125 ? . .
S(5) H(15) 3.158 ? . 2_565
S(5) H(22) 3.072 ? . .
S(5) H(23) 3.234 ? . 2_565
S(5) H(26) 3.252 ? . .
S(5) H(34) 3.352 ? . .
S(5) H(57) 3.255 ? . .
S(6) H(19) 3.445 ? . 2_565
S(6) H(21) 3.409 ? . 2_565
S(6) H(51) 3.115 ? . .
S(6) H(52) 3.193 ? . .
S(6) H(57) 3.582 ? . .
S(6) H(59) 3.070 ? . .
S(6) H(69) 3.211 ? . 2_666
S(6) H(76) 3.440 ? . .
S(6) H(77) 3.223 ? . 2_666
S(6) H(81) 3.198 ? . 2_666
S(7) H(16) 3.225 ? . 2_565
S(7) H(26) 3.203 ? . .
S(7) H(29) 3.319 ? . .
S(7) H(40) 3.159 ? . 2_565
S(7) H(44) 3.066 ? . 2_565
S(7) H(55) 3.540 ? . .
S(8) H(7) 3.555 ? . 2_576
S(8) H(11) 3.577 ? . 2_576
S(8) H(21) 3.172 ? . 2_565
S(8) H(51) 3.213 ? . .
S(8) H(63) 2.998 ? . .
N(1) H(13) 2.026 ? . .
N(1) H(14) 2.029 ? . .
N(1) H(15) 2.757 ? . .
N(1) H(16) 2.799 ? . .
N(1) H(22) 2.025 ? . .
N(1) H(23) 2.024 ? . .
N(1) H(24) 2.755 ? . .
N(1) H(25) 2.758 ? . .
N(1) H(31) 2.035 ? . .
N(1) H(32) 2.035 ? . .
N(1) H(33) 2.773 ? . .
N(1) H(34) 2.771 ? . .
N(1) H(40) 2.044 ? . .
N(1) H(41) 2.036 ? . .
N(1) H(42) 2.772 ? . .
N(1) H(43) 2.752 ? . .
N(2) H(49) 2.023 ? . .
N(2) H(50) 2.027 ? . .
N(2) H(51) 2.752 ? . .
N(2) H(52) 2.752 ? . .
N(2) H(58) 2.029 ? . .
N(2) H(59) 2.019 ? . .
N(2) H(60) 2.787 ? . .
N(2) H(61) 2.723 ? . .
N(2) H(67) 2.018 ? . .
N(2) H(68) 2.019 ? . .
N(2) H(69) 2.736 ? . .
N(2) H(70) 2.847 ? . .
N(2) H(76) 2.024 ? . .
N(2) H(77) 2.023 ? . .
N(2) H(78) 2.698 ? . .
N(2) H(79) 2.855 ? . .
C(1) H(2) 2.737 ? . 2_655
C(1) H(3) 3.388 ? . 2_655
C(1) H(33) 2.994 ? . .
C(1) H(37) 3.246 ? . .
C(1) H(39) 3.413 ? . .
C(2) H(2) 3.016 ? . 2_655
C(2) H(3) 3.152 ? . 2_655
C(2) H(37) 3.070 ? . .
C(2) H(39) 3.250 ? . .
C(2) H(62) 3.357 ? . 2_666
C(2) H(80) 3.563 ? . .
C(3) H(3) 3.412 ? . 2_655
C(3) H(31) 3.483 ? . 2_555
C(4) H(14) 3.261 ? . 2_555
C(4) H(31) 3.171 ? . 2_555
C(5) H(1) 2.107 ? . .
C(5) H(2) 2.115 ? . .
C(5) H(3) 2.101 ? . .
C(5) H(4) 2.928 ? . .
C(5) H(5) 2.632 ? . .
C(5) H(6) 3.203 ? . .
C(5) H(25) 3.543 ? . 2_555
C(6) H(1) 3.049 ? . .
C(6) H(2) 2.757 ? . .
C(6) H(3) 3.278 ? . .
C(6) H(4) 2.064 ? . .
C(6) H(5) 2.073 ? . .
C(6) H(6) 2.053 ? . .
C(6) H(24) 3.459 ? . 2_555
C(7) H(4) 3.394 ? . .
C(7) H(5) 2.769 ? . .
C(7) H(30) 3.381 ? . 2_555
C(7) H(61) 3.290 ? . 1_544
C(7) H(62) 3.388 ? . 1_544
C(7) H(66) 3.593 ? . 1_544
C(7) H(70) 3.183 ? . 1_544
C(8) H(1) 3.442 ? . .
C(8) H(2) 2.795 ? . .
C(8) H(28) 3.135 ? . 1_645
C(8) H(29) 3.598 ? . 1_645
C(8) H(45) 3.226 ? . 2_655
C(8) H(74) 3.361 ? . 2_656
C(9) H(15) 3.306 ? . 2_565
C(9) H(16) 3.217 ? . 2_565
C(9) H(21) 3.259 ? . 2_565
C(9) H(55) 3.458 ? . .
C(9) H(57) 2.947 ? . .
C(10) H(21) 2.839 ? . 2_565
C(10) H(51) 3.119 ? . .
C(10) H(55) 3.584 ? . .
C(10) H(57) 3.101 ? . .
C(11) H(11) 3.236 ? . 2_576
C(11) H(12) 3.548 ? . 2_576
C(11) H(55) 3.492 ? . .
C(12) H(11) 3.432 ? . 2_576
C(12) H(12) 3.377 ? . 2_576
C(13) H(7) 2.027 ? . .
C(13) H(8) 2.029 ? . .
C(13) H(9) 2.026 ? . .
C(13) H(10) 2.980 ? . .
C(13) H(11) 2.670 ? . .
C(13) H(12) 3.227 ? . .
C(13) H(68) 3.332 ? . 2_566
C(13) H(78) 3.439 ? . 2_566
C(14) H(7) 2.962 ? . .
C(14) H(8) 2.706 ? . .
C(14) H(9) 3.263 ? . .
C(14) H(10) 2.031 ? . .
C(14) H(11) 2.047 ? . .
C(14) H(12) 2.022 ? . .
C(14) H(49) 3.412 ? . 2_566
C(14) H(79) 3.583 ? . 2_566
C(15) H(10) 3.476 ? . .
C(15) H(11) 2.804 ? . .
C(15) H(78) 3.445 ? . 2_566
C(15) H(82) 3.588 ? . 1_465
C(16) H(7) 3.401 ? . .
C(16) H(8) 2.845 ? . .
C(16) H(16) 3.596 ? . 1_566
C(16) H(43) 3.415 ? . 1_566
C(16) H(48) 3.571 ? . 1_566
C(16) H(79) 3.518 ? . 2_566
C(16) H(84) 3.593 ? . 2_566
C(17) H(15) 2.039 ? . .
C(17) H(16) 2.034 ? . .
C(17) H(17) 2.564 ? . .
C(17) H(18) 2.600 ? . .
C(17) H(22) 3.313 ? . .
C(17) H(23) 2.671 ? . .
C(17) H(24) 2.759 ? . .
C(17) H(25) 3.386 ? . .
C(17) H(31) 2.554 ? . .
C(17) H(32) 2.552 ? . .
C(17) H(40) 2.728 ? . .
C(17) H(41) 3.328 ? . .
C(17) H(42) 3.366 ? . .
C(17) H(43) 2.738 ? . .
C(18) H(13) 2.010 ? . .
C(18) H(14) 2.002 ? . .
C(18) H(17) 2.029 ? . .
C(18) H(18) 2.018 ? . .
C(18) H(19) 2.916 ? . .
C(18) H(20) 3.273 ? . .
C(18) H(21) 2.505 ? . .
C(18) H(23) 2.759 ? . .
C(18) H(24) 3.312 ? . .
C(18) H(40) 2.737 ? . .
C(18) H(43) 3.089 ? . .
C(18) H(73) 3.190 ? . 1_454
C(19) H(13) 2.592 ? . .
C(19) H(14) 2.539 ? . .
C(19) H(15) 2.053 ? . .
C(19) H(16) 2.040 ? . .
C(19) H(19) 2.008 ? . .
C(19) H(20) 2.008 ? . .
C(19) H(21) 1.983 ? . .
C(19) H(73) 3.180 ? . 1_454
C(19) H(83) 3.542 ? . 2_555
C(19) H(84) 3.176 ? . 2_555
C(20) H(11) 3.468 ? . 1_544
C(20) H(15) 2.736 ? . .
C(20) H(16) 2.701 ? . .
C(20) H(17) 1.995 ? . .
C(20) H(18) 1.981 ? . .
C(20) H(73) 3.398 ? . 1_454
C(20) H(81) 3.309 ? . 1_454
C(20) H(82) 3.048 ? . 1_454
C(20) H(84) 3.452 ? . 2_555
C(21) H(13) 3.312 ? . .
C(21) H(14) 2.657 ? . .
C(21) H(15) 2.784 ? . .
C(21) H(16) 3.471 ? . .
C(21) H(24) 2.019 ? . .
C(21) H(25) 2.022 ? . .
C(21) H(26) 2.544 ? . .
C(21) H(27) 2.698 ? . .
C(21) H(31) 2.694 ? . .
C(21) H(32) 3.321 ? . .
C(21) H(33) 3.370 ? . .
C(21) H(34) 2.755 ? . .
C(21) H(40) 2.561 ? . .
C(21) H(41) 2.573 ? . .
C(22) H(14) 2.705 ? . .
C(22) H(15) 3.333 ? . .
C(22) H(22) 1.988 ? . .
C(22) H(23) 1.992 ? . .
C(22) H(26) 2.111 ? . .
C(22) H(27) 2.110 ? . .
C(22) H(28) 2.825 ? . .
C(22) H(29) 3.193 ? . .
C(22) H(30) 2.349 ? . .
C(22) H(31) 2.691 ? . .
C(22) H(34) 3.133 ? . .
C(23) H(22) 2.562 ? . .
C(23) H(23) 2.570 ? . .
C(23) H(24) 2.133 ? . .
C(23) H(25) 2.129 ? . .
C(23) H(28) 1.882 ? . .
C(23) H(29) 1.851 ? . .
C(23) H(30) 1.843 ? . .
C(24) H(1) 3.409 ? . 2_555
C(24) H(5) 3.563 ? . 1_465
C(24) H(6) 3.437 ? . 1_465
C(24) H(24) 2.708 ? . .
C(24) H(25) 2.599 ? . .
C(24) H(26) 1.875 ? . .
C(24) H(27) 1.835 ? . .
C(24) H(71) 2.938 ? . 2_566
C(25) H(13) 2.516 ? . .
C(25) H(14) 2.586 ? . .
C(25) H(22) 2.716 ? . .
C(25) H(23) 3.320 ? . .
C(25) H(24) 3.315 ? . .
C(25) H(25) 2.711 ? . .
C(25) H(33) 2.046 ? . .
C(25) H(34) 2.040 ? . .
C(25) H(35) 2.667 ? . .
C(25) H(36) 2.558 ? . .
C(25) H(40) 3.338 ? . .
C(25) H(41) 2.699 ? . .
C(25) H(42) 2.766 ? . .
C(25) H(43) 3.363 ? . .
C(26) H(22) 2.763 ? . .
C(26) H(25) 3.127 ? . .
C(26) H(31) 2.027 ? . .
C(26) H(32) 2.021 ? . .
C(26) H(35) 1.992 ? . .
C(26) H(36) 1.989 ? . .
C(26) H(37) 2.933 ? . .
C(26) H(38) 3.282 ? . .
C(26) H(39) 2.556 ? . .
C(26) H(41) 2.723 ? . .
C(26) H(42) 3.196 ? . .
C(27) H(31) 2.628 ? . .
C(27) H(32) 2.620 ? . .
C(27) H(33) 2.010 ? . .
C(27) H(34) 2.012 ? . .
C(27) H(37) 2.007 ? . .
C(27) H(38) 2.025 ? . .
C(27) H(39) 2.008 ? . .
C(27) H(42) 3.058 ? . 2_555
C(27) H(48) 3.472 ? . 2_555
C(28) H(33) 2.680 ? . .
C(28) H(34) 2.774 ? . .
C(28) H(35) 1.991 ? . .
C(28) H(36) 2.002 ? . .
C(28) H(42) 3.335 ? . 2_555
C(28) H(43) 3.496 ? . 2_555
C(28) H(48) 3.414 ? . 2_555
C(28) H(53) 3.423 ? . .
C(29) H(13) 2.741 ? . .
C(29) H(14) 3.332 ? . .
C(29) H(15) 3.283 ? . .
C(29) H(16) 2.759 ? . .
C(29) H(22) 2.539 ? . .
C(29) H(23) 2.578 ? . .
C(29) H(31) 3.336 ? . .
C(29) H(32) 2.715 ? . .
C(29) H(33) 2.748 ? . .
C(29) H(34) 3.362 ? . .
C(29) H(42) 2.028 ? . .
C(29) H(43) 2.016 ? . .
C(29) H(44) 2.665 ? . .
C(29) H(45) 2.619 ? . .
C(30) H(12) 3.599 ? . 1_544
C(30) H(13) 2.785 ? . .
C(30) H(16) 3.096 ? . .
C(30) H(32) 2.758 ? . .
C(30) H(33) 3.186 ? . .
C(30) H(36) 3.197 ? . 2_555
C(30) H(38) 3.558 ? . 2_555
C(30) H(40) 2.007 ? . .
C(30) H(41) 1.995 ? . .
C(30) H(44) 2.044 ? . .
C(30) H(45) 2.041 ? . .
C(30) H(46) 2.949 ? . .
C(30) H(47) 3.310 ? . .
C(30) H(48) 2.540 ? . .
C(31) H(4) 3.110 ? . 2_655
C(31) H(12) 3.480 ? . 1_544
C(31) H(40) 2.607 ? . .
C(31) H(41) 2.617 ? . .
C(31) H(42) 2.055 ? . .
C(31) H(43) 2.053 ? . .
C(31) H(46) 2.045 ? . .
C(31) H(47) 2.056 ? . .
C(31) H(48) 2.031 ? . .
C(32) H(4) 3.540 ? . 2_655
C(32) H(12) 3.322 ? . 1_544
C(32) H(35) 3.478 ? . 2_555
C(32) H(38) 3.546 ? . 2_555
C(32) H(42) 2.712 ? . .
C(32) H(43) 2.763 ? . .
C(32) H(44) 2.033 ? . .
C(32) H(45) 2.031 ? . .
C(32) H(64) 3.509 ? . 1_544
C(32) H(65) 3.359 ? . 1_544
C(33) H(51) 2.025 ? . .
C(33) H(52) 2.026 ? . .
C(33) H(53) 2.715 ? . .
C(33) H(54) 2.581 ? . .
C(33) H(58) 3.313 ? . .
C(33) H(59) 2.693 ? . .
C(33) H(60) 2.744 ? . .
C(33) H(61) 3.264 ? . .
C(33) H(67) 2.547 ? . .
C(33) H(68) 2.548 ? . .
C(33) H(76) 2.678 ? . .
C(33) H(77) 3.315 ? . .
C(33) H(78) 3.284 ? . .
C(33) H(79) 2.894 ? . .
C(34) H(49) 2.007 ? . .
C(34) H(50) 2.007 ? . .
C(34) H(53) 2.009 ? . .
C(34) H(54) 2.008 ? . .
C(34) H(55) 2.926 ? . .
C(34) H(56) 3.287 ? . .
C(34) H(57) 2.540 ? . .
C(34) H(59) 2.690 ? . .
C(34) H(60) 3.028 ? . .
C(34) H(76) 2.759 ? . .
C(34) H(79) 3.368 ? . .
C(35) H(39) 3.564 ? . .
C(35) H(49) 2.636 ? . .
C(35) H(50) 2.631 ? . .
C(35) H(51) 2.017 ? . .
C(35) H(52) 2.021 ? . .
C(35) H(55) 2.024 ? . .
C(35) H(56) 2.049 ? . .
C(35) H(57) 2.029 ? . .
C(35) H(60) 3.169 ? . 2_566
C(36) H(39) 3.400 ? . .
C(36) H(50) 3.553 ? . 2_566
C(36) H(51) 2.652 ? . .
C(36) H(52) 2.771 ? . .
C(36) H(53) 2.014 ? . .
C(36) H(54) 2.031 ? . .
C(36) H(60) 3.318 ? . 2_566
C(36) H(61) 3.510 ? . 2_566
C(36) H(66) 3.589 ? . 2_566
C(37) H(49) 3.308 ? . .
C(37) H(50) 2.726 ? . .
C(37) H(51) 2.684 ? . .
C(37) H(52) 3.277 ? . .
C(37) H(60) 2.032 ? . .
C(37) H(61) 2.016 ? . .
C(37) H(62) 2.644 ? . .
C(37) H(63) 2.622 ? . .
C(37) H(67) 2.695 ? . .
C(37) H(68) 3.312 ? . .
C(37) H(69) 3.289 ? . .
C(37) H(70) 2.853 ? . .
C(37) H(76) 2.546 ? . .
C(37) H(77) 2.506 ? . .
C(38) H(3) 3.449 ? . 1_566
C(38) H(50) 2.744 ? . .
C(38) H(51) 2.997 ? . .
C(38) H(54) 3.377 ? . 2_566
C(38) H(56) 3.521 ? . 2_566
C(38) H(58) 2.007 ? . .
C(38) H(59) 1.994 ? . .
C(38) H(62) 2.050 ? . .
C(38) H(63) 2.037 ? . .
C(38) H(64) 2.949 ? . .
C(38) H(65) 3.315 ? . .
C(38) H(66) 2.525 ? . .
C(38) H(67) 2.771 ? . .
C(38) H(70) 3.284 ? . .
C(39) H(3) 3.094 ? . 1_566
C(39) H(58) 2.573 ? . .
C(39) H(59) 2.639 ? . .
C(39) H(60) 2.060 ? . .
C(39) H(61) 2.048 ? . .
C(39) H(64) 2.058 ? . .
C(39) H(65) 2.065 ? . .
C(39) H(66) 2.023 ? . .
C(39) H(80) 3.483 ? . 2_666
C(40) H(3) 3.200 ? . 1_566
C(40) H(46) 3.549 ? . 1_566
C(40) H(47) 3.429 ? . 1_566
C(40) H(60) 2.721 ? . .
C(40) H(61) 2.747 ? . .
C(40) H(62) 2.047 ? . .
C(40) H(63) 2.030 ? . .
C(41) H(49) 2.586 ? . .
C(41) H(50) 2.530 ? . .
C(41) H(58) 2.683 ? . .
C(41) H(59) 3.311 ? . .
C(41) H(60) 3.449 ? . .
C(41) H(61) 2.749 ? . .
C(41) H(69) 2.034 ? . .
C(41) H(70) 2.037 ? . .
C(41) H(71) 2.617 ? . .
C(41) H(72) 2.667 ? . .
C(41) H(76) 3.305 ? . .
C(41) H(77) 2.693 ? . .
C(41) H(78) 2.651 ? . .
C(41) H(79) 3.461 ? . .
C(42) H(1) 3.539 ? . 1_566
C(42) H(19) 3.456 ? . 1_656
C(42) H(58) 2.752 ? . .
C(42) H(61) 3.263 ? . .
C(42) H(67) 2.011 ? . .
C(42) H(68) 2.010 ? . .
C(42) H(71) 2.035 ? . .
C(42) H(72) 2.019 ? . .
C(42) H(73) 2.899 ? . .
C(42) H(74) 3.261 ? . .
C(42) H(75) 2.485 ? . .
C(42) H(77) 2.757 ? . .
C(42) H(78) 3.127 ? . .
C(43) H(6) 3.411 ? . 2_656
C(43) H(19) 3.426 ? . 1_656
C(43) H(29) 3.566 ? . 2_566
C(43) H(67) 2.673 ? . .
C(43) H(68) 2.564 ? . .
C(43) H(69) 2.047 ? . .
C(43) H(70) 2.029 ? . .
C(43) H(73) 2.006 ? . .
C(43) H(74) 2.004 ? . .
C(43) H(75) 1.979 ? . .
C(44) H(5) 3.594 ? . 1_566
C(44) H(6) 3.347 ? . 2_656
C(44) H(15) 3.428 ? . 1_656
C(44) H(18) 3.511 ? . 1_656
C(44) H(19) 3.481 ? . 1_656
C(44) H(24) 3.414 ? . 1_656
C(44) H(27) 3.535 ? . 1_656
C(44) H(69) 2.721 ? . .
C(44) H(70) 2.658 ? . .
C(44) H(71) 1.993 ? . .
C(44) H(72) 1.977 ? . .
C(45) H(49) 2.669 ? . .
C(45) H(50) 3.319 ? . .
C(45) H(51) 3.408 ? . .
C(45) H(52) 2.783 ? . .
C(45) H(58) 2.546 ? . .
C(45) H(59) 2.510 ? . .
C(45) H(67) 3.303 ? . .
C(45) H(68) 2.681 ? . .
C(45) H(69) 2.706 ? . .
C(45) H(70) 3.462 ? . .
C(45) H(78) 2.024 ? . .
C(45) H(79) 2.035 ? . .
C(45) H(80) 2.645 ? . .
C(45) H(81) 2.672 ? . .
C(46) H(10) 3.499 ? . 2_566
C(46) H(49) 2.749 ? . .
C(46) H(52) 3.328 ? . .
C(46) H(68) 2.711 ? . .
C(46) H(69) 3.140 ? . .
C(46) H(76) 2.000 ? . .
C(46) H(77) 2.003 ? . .
C(46) H(80) 2.091 ? . .
C(46) H(81) 2.097 ? . .
C(46) H(82) 2.897 ? . .
C(46) H(83) 3.257 ? . .
C(46) H(84) 2.468 ? . .
C(47) H(19) 3.600 ? . 1_656
C(47) H(20) 3.573 ? . 1_656
C(47) H(63) 3.459 ? . 2_666
C(47) H(76) 2.716 ? . .
C(47) H(77) 2.541 ? . .
C(47) H(78) 2.116 ? . .
C(47) H(79) 2.122 ? . .
C(47) H(82) 1.908 ? . .
C(47) H(83) 1.903 ? . .
C(47) H(84) 1.904 ? . .
C(48) H(17) 2.965 ? . 2_555
C(48) H(20) 3.219 ? . 1_656
C(48) H(20) 3.244 ? . 2_555
C(48) H(78) 2.726 ? . .
C(48) H(79) 2.708 ? . .
C(48) H(80) 1.900 ? . .
C(48) H(81) 1.895 ? . .
H(1) Se(1) 3.296 ? . .
H(1) C(5) 2.107 ? . .
H(1) C(6) 3.049 ? . .
H(1) C(8) 3.442 ? . .
H(1) C(24) 3.409 ? . 2_555
H(1) C(42) 3.539 ? . 1_544
H(1) H(2) 1.551 ? . .
H(1) H(3) 1.551 ? . .
H(1) H(5) 2.922 ? . .
H(1) H(25) 3.497 ? . 2_555
H(1) H(28) 3.532 ? . 2_555
H(1) H(30) 2.548 ? . 2_555
H(1) H(61) 2.831 ? . 1_544
H(1) H(62) 3.587 ? . 1_544
H(1) H(66) 3.503 ? . 1_544
H(1) H(67) 3.472 ? . 1_544
H(1) H(70) 2.831 ? . 1_544
H(1) H(71) 3.168 ? . 1_544
H(1) H(75) 3.478 ? . 1_544
H(2) S(1) 3.153 ? . 2_655
H(2) S(3) 3.399 ? . 2_655
H(2) C(1) 2.737 ? . 2_655
H(2) C(2) 3.016 ? . 2_655
H(2) C(5) 2.115 ? . .
H(2) C(6) 2.757 ? . .
H(2) C(8) 2.795 ? . .
H(2) H(1) 1.551 ? . .
H(2) H(3) 1.551 ? . .
H(2) H(4) 2.900 ? . .
H(2) H(5) 2.380 ? . .
H(2) H(70) 2.899 ? . 1_544
H(2) H(75) 2.919 ? . 1_544
H(3) Se(1) 2.842 ? . .
H(3) S(4) 3.335 ? . 2_655
H(3) C(1) 3.388 ? . 2_655
H(3) C(2) 3.152 ? . 2_655
H(3) C(3) 3.412 ? . 2_655
H(3) C(5) 2.101 ? . .
H(3) C(6) 3.278 ? . .
H(3) C(38) 3.449 ? . 1_544
H(3) C(39) 3.094 ? . 1_544
H(3) C(40) 3.200 ? . 1_544
H(3) H(1) 1.551 ? . .
H(3) H(2) 1.551 ? . .
H(3) H(61) 2.898 ? . 1_544
H(3) H(62) 2.531 ? . 1_544
H(3) H(65) 3.084 ? . 1_544
H(3) H(66) 2.915 ? . 1_544
H(3) H(70) 3.311 ? . 1_544
H(4) Se(2) 3.309 ? . .
H(4) S(1) 3.437 ? . 2_655
H(4) S(3) 3.310 ? . 2_655
H(4) C(5) 2.928 ? . .
H(4) C(6) 2.064 ? . .
H(4) C(7) 3.394 ? . .
H(4) C(31) 3.110 ? . 2_655
H(4) C(32) 3.540 ? . 2_655
H(4) H(2) 2.900 ? . .
H(4) H(5) 1.551 ? . .
H(4) H(6) 1.551 ? . .
H(4) H(28) 3.282 ? . 1_645
H(4) H(29) 3.474 ? . 1_645
H(4) H(44) 3.320 ? . 2_655
H(4) H(45) 2.306 ? . 2_655
H(4) H(46) 3.355 ? . 2_655
H(4) H(47) 3.517 ? . 2_655
H(5) C(5) 2.632 ? . .
H(5) C(6) 2.073 ? . .
H(5) C(7) 2.769 ? . .
H(5) C(24) 3.563 ? . 1_645
H(5) C(44) 3.594 ? . 1_544
H(5) H(1) 2.922 ? . .
H(5) H(2) 2.380 ? . .
H(5) H(4) 1.551 ? . .
H(5) H(6) 1.551 ? . .
H(5) H(27) 3.593 ? . 1_645
H(5) H(28) 2.770 ? . 1_645
H(5) H(28) 3.317 ? . 2_555
H(5) H(74) 3.150 ? . 1_544
H(5) H(74) 3.280 ? . 2_656
H(5) H(75) 3.175 ? . 1_544
H(6) Se(2) 2.893 ? . .
H(6) C(5) 3.203 ? . .
H(6) C(6) 2.053 ? . .
H(6) C(24) 3.437 ? . 1_645
H(6) C(43) 3.411 ? . 2_656
H(6) C(44) 3.347 ? . 2_656
H(6) H(4) 1.551 ? . .
H(6) H(5) 1.551 ? . .
H(6) H(28) 2.855 ? . 1_645
H(6) H(29) 3.138 ? . 1_645
H(6) H(45) 3.488 ? . 2_655
H(6) H(71) 3.105 ? . 2_656
H(6) H(72) 3.237 ? . 2_656
H(6) H(74) 2.680 ? . 2_656
H(7) Se(3) 3.249 ? . .
H(7) Se(4) 3.523 ? . 2_576
H(7) S(8) 3.555 ? . 2_576
H(7) C(13) 2.027 ? . .
H(7) C(14) 2.962 ? . .
H(7) C(16) 3.401 ? . .
H(7) H(8) 1.551 ? . .
H(7) H(9) 1.551 ? . .
H(7) H(11) 2.900 ? . .
H(7) H(63) 3.591 ? . 2_576
H(7) H(64) 3.290 ? . 2_576
H(7) H(82) 3.479 ? . 1_465
H(7) H(83) 3.341 ? . 1_465
H(8) C(13) 2.029 ? . .
H(8) C(14) 2.706 ? . .
H(8) C(16) 2.845 ? . .
H(8) H(7) 1.551 ? . .
H(8) H(9) 1.551 ? . .
H(8) H(10) 3.008 ? . .
H(8) H(11) 2.434 ? . .
H(8) H(20) 3.198 ? . 1_566
H(8) H(20) 3.479 ? . 2_465
H(8) H(78) 3.034 ? . 2_566
H(8) H(82) 3.056 ? . 1_465
H(8) H(82) 3.300 ? . 2_566
H(8) H(83) 3.494 ? . 1_465
H(8) H(84) 3.172 ? . 2_566
H(9) Se(3) 2.806 ? . .
H(9) C(13) 2.026 ? . .
H(9) C(14) 3.263 ? . .
H(9) H(7) 1.551 ? . .
H(9) H(8) 1.551 ? . .
H(9) H(18) 3.512 ? . 2_465
H(9) H(20) 3.599 ? . 2_465
H(9) H(68) 3.533 ? . 2_566
H(9) H(72) 3.110 ? . 2_566
H(9) H(78) 3.381 ? . 2_566
H(9) H(83) 3.487 ? . 1_465
H(10) Se(4) 3.255 ? . .
H(10) C(13) 2.980 ? . .
H(10) C(14) 2.031 ? . .
H(10) C(15) 3.476 ? . .
H(10) C(46) 3.499 ? . 2_566
H(10) H(8) 3.008 ? . .
H(10) H(11) 1.551 ? . .
H(10) H(12) 1.551 ? . .
H(10) H(16) 3.576 ? . 1_566
H(10) H(17) 3.264 ? . 1_566
H(10) H(38) 3.311 ? . 2_566
H(10) H(43) 3.210 ? . 1_566
H(10) H(48) 3.557 ? . 1_566
H(10) H(78) 3.504 ? . 2_566
H(10) H(79) 2.747 ? . 2_566
H(10) H(84) 2.890 ? . 2_566
H(11) S(8) 3.577 ? . 2_576
H(11) C(11) 3.236 ? . 2_576
H(11) C(12) 3.432 ? . 2_576
H(11) C(13) 2.670 ? . .
H(11) C(14) 2.047 ? . .
H(11) C(15) 2.804 ? . .
H(11) C(20) 3.468 ? . 1_566
H(11) H(7) 2.900 ? . .
H(11) H(8) 2.434 ? . .
H(11) H(10) 1.551 ? . .
H(11) H(12) 1.551 ? . .
H(11) H(16) 3.144 ? . 1_566
H(11) H(17) 3.339 ? . 1_566
H(11) H(20) 3.413 ? . 1_566
H(11) H(21) 2.906 ? . 1_566
H(11) H(84) 3.494 ? . 2_566
H(12) Se(3) 3.476 ? . 2_576
H(12) Se(4) 2.815 ? . .
H(12) C(11) 3.548 ? . 2_576
H(12) C(12) 3.377 ? . 2_576
H(12) C(13) 3.227 ? . .
H(12) C(14) 2.022 ? . .
H(12) C(30) 3.599 ? . 1_566
H(12) C(31) 3.480 ? . 1_566
H(12) C(32) 3.322 ? . 1_566
H(12) H(10) 1.551 ? . .
H(12) H(11) 1.551 ? . .
H(12) H(16) 3.501 ? . 1_566
H(12) H(43) 2.890 ? . 1_566
H(12) H(44) 3.124 ? . 1_566
H(12) H(47) 3.311 ? . 1_566
H(12) H(48) 2.789 ? . 1_566
H(13) N(1) 2.026 ? . .
H(13) C(18) 2.010 ? . .
H(13) C(19) 2.592 ? . .
H(13) C(21) 3.312 ? . .
H(13) C(25) 2.516 ? . .
H(13) C(29) 2.741 ? . .
H(13) C(30) 2.785 ? . .
H(13) H(14) 1.551 ? . .
H(13) H(15) 2.780 ? . .
H(13) H(16) 2.284 ? . .
H(13) H(17) 2.359 ? . .
H(13) H(18) 2.880 ? . .
H(13) H(23) 3.537 ? . .
H(13) H(31) 2.744 ? . .
H(13) H(32) 2.286 ? . .
H(13) H(37) 3.194 ? . 2_555
H(13) H(40) 3.070 ? . .
H(13) H(41) 3.569 ? . .
H(13) H(42) 2.959 ? . .
H(13) H(43) 2.287 ? . .
H(14) Se(2) 3.090 ? . 2_555
H(14) N(1) 2.029 ? . .
H(14) C(4) 3.261 ? . 2_555
H(14) C(18) 2.002 ? . .
H(14) C(19) 2.539 ? . .
H(14) C(21) 2.657 ? . .
H(14) C(22) 2.705 ? . .
H(14) C(25) 2.586 ? . .
H(14) C(29) 3.332 ? . .
H(14) H(13) 1.551 ? . .
H(14) H(15) 2.319 ? . .
H(14) H(16) 2.769 ? . .
H(14) H(17) 2.748 ? . .
H(14) H(18) 2.342 ? . .
H(14) H(22) 3.521 ? . .
H(14) H(23) 2.910 ? . .
H(14) H(24) 2.198 ? . .
H(14) H(25) 2.961 ? . .
H(14) H(31) 2.362 ? . .
H(14) H(32) 2.842 ? . .
H(14) H(40) 3.556 ? . .
H(14) H(73) 3.517 ? . 1_454
H(15) S(5) 3.158 ? . 2_565
H(15) N(1) 2.757 ? . .
H(15) C(9) 3.306 ? . 2_565
H(15) C(17) 2.039 ? . .
H(15) C(19) 2.053 ? . .
H(15) C(20) 2.736 ? . .
H(15) C(21) 2.784 ? . .
H(15) C(22) 3.333 ? . .
H(15) C(29) 3.283 ? . .
H(15) C(44) 3.428 ? . 1_454
H(15) H(13) 2.780 ? . .
H(15) H(14) 2.319 ? . .
H(15) H(16) 1.551 ? . .
H(15) H(17) 2.799 ? . .
H(15) H(18) 2.307 ? . .
H(15) H(19) 2.849 ? . .
H(15) H(21) 2.704 ? . .
H(15) H(23) 2.227 ? . .
H(15) H(24) 2.912 ? . .
H(15) H(40) 2.844 ? . .
H(15) H(73) 2.516 ? . 1_454
H(16) S(7) 3.225 ? . 2_565
H(16) N(1) 2.799 ? . .
H(16) C(9) 3.217 ? . 2_565
H(16) C(16) 3.596 ? . 1_544
H(16) C(17) 2.034 ? . .
H(16) C(19) 2.040 ? . .
H(16) C(20) 2.701 ? . .
H(16) C(21) 3.471 ? . .
H(16) C(29) 2.759 ? . .
H(16) C(30) 3.096 ? . .
H(16) H(10) 3.576 ? . 1_544
H(16) H(11) 3.144 ? . 1_544
H(16) H(12) 3.501 ? . 1_544
H(16) H(13) 2.284 ? . .
H(16) H(14) 2.769 ? . .
H(16) H(15) 1.551 ? . .
H(16) H(17) 2.333 ? . .
H(16) H(18) 2.782 ? . .
H(16) H(19) 3.266 ? . .
H(16) H(20) 3.405 ? . .
H(16) H(21) 2.378 ? . .
H(16) H(23) 3.067 ? . .
H(16) H(40) 2.306 ? . .
H(16) H(43) 2.551 ? . .
H(17) C(17) 2.564 ? . .
H(17) C(18) 2.029 ? . .
H(17) C(20) 1.995 ? . .
H(17) C(48) 2.965 ? . 2_555
H(17) H(10) 3.264 ? . 1_544
H(17) H(11) 3.339 ? . 1_544
H(17) H(13) 2.359 ? . .
H(17) H(14) 2.748 ? . .
H(17) H(15) 2.799 ? . .
H(17) H(16) 2.333 ? . .
H(17) H(18) 1.551 ? . .
H(17) H(19) 2.726 ? . .
H(17) H(20) 2.156 ? . .
H(17) H(21) 2.439 ? . .
H(17) H(82) 3.311 ? . 2_555
H(17) H(83) 2.850 ? . 2_555
H(17) H(84) 2.339 ? . 2_555
H(18) Se(2) 3.358 ? . 2_555
H(18) C(17) 2.600 ? . .
H(18) C(18) 2.018 ? . .
H(18) C(20) 1.981 ? . .
H(18) C(44) 3.511 ? . 1_454
H(18) H(9) 3.512 ? . 2_465
H(18) H(13) 2.880 ? . .
H(18) H(14) 2.342 ? . .
H(18) H(15) 2.307 ? . .
H(18) H(16) 2.782 ? . .
H(18) H(17) 1.551 ? . .
H(18) H(19) 2.144 ? . .
H(18) H(20) 2.446 ? . .
H(18) H(21) 2.699 ? . .
H(18) H(72) 3.201 ? . 1_454
H(18) H(73) 2.685 ? . 1_454
H(18) H(83) 3.525 ? . 2_555
H(18) H(84) 3.574 ? . 2_555
H(19) S(6) 3.445 ? . 2_565
H(19) C(18) 2.916 ? . .
H(19) C(19) 2.008 ? . .
H(19) C(42) 3.456 ? . 1_454
H(19) C(43) 3.426 ? . 1_454
H(19) C(44) 3.481 ? . 1_454
H(19) C(47) 3.600 ? . 1_454
H(19) H(15) 2.849 ? . .
H(19) H(16) 3.266 ? . .
H(19) H(17) 2.726 ? . .
H(19) H(18) 2.144 ? . .
H(19) H(20) 1.551 ? . .
H(19) H(21) 1.551 ? . .
H(19) H(69) 2.739 ? . 1_454
H(19) H(72) 2.968 ? . 1_454
H(19) H(73) 2.794 ? . 1_454
H(19) H(78) 3.156 ? . 1_454
H(19) H(81) 2.973 ? . 1_454
H(19) H(82) 3.155 ? . 1_454
H(20) C(18) 3.273 ? . .
H(20) C(19) 2.008 ? . .
H(20) C(47) 3.573 ? . 1_454
H(20) C(48) 3.219 ? . 1_454
H(20) C(48) 3.244 ? . 2_555
H(20) H(8) 3.198 ? . 1_544
H(20) H(8) 3.479 ? . 2_465
H(20) H(9) 3.599 ? . 2_465
H(20) H(11) 3.413 ? . 1_544
H(20) H(16) 3.405 ? . .
H(20) H(17) 2.156 ? . .
H(20) H(18) 2.446 ? . .
H(20) H(19) 1.551 ? . .
H(20) H(21) 1.551 ? . .
H(20) H(78) 3.553 ? . 1_454
H(20) H(81) 3.136 ? . 1_454
H(20) H(82) 2.325 ? . 1_454
H(20) H(82) 2.936 ? . 2_555
H(20) H(83) 3.405 ? . 2_555
H(20) H(84) 2.884 ? . 2_555
H(21) S(6) 3.409 ? . 2_565
H(21) S(8) 3.172 ? . 2_565
H(21) C(9) 3.259 ? . 2_565
H(21) C(10) 2.839 ? . 2_565
H(21) C(18) 2.505 ? . .
H(21) C(19) 1.983 ? . .
H(21) H(11) 2.906 ? . 1_544
H(21) H(15) 2.704 ? . .
H(21) H(16) 2.378 ? . .
H(21) H(17) 2.439 ? . .
H(21) H(18) 2.699 ? . .
H(21) H(19) 1.551 ? . .
H(21) H(20) 1.551 ? . .
H(21) H(81) 3.272 ? . 1_454
H(21) H(82) 3.253 ? . 1_454
H(22) S(5) 3.072 ? . .
H(22) N(1) 2.025 ? . .
H(22) C(17) 3.313 ? . .
H(22) C(22) 1.988 ? . .
H(22) C(23) 2.562 ? . .
H(22) C(25) 2.716 ? . .
H(22) C(26) 2.763 ? . .
H(22) C(29) 2.539 ? . .
H(22) H(14) 3.521 ? . .
H(22) H(23) 1.551 ? . .
H(22) H(24) 2.762 ? . .
H(22) H(25) 2.289 ? . .
H(22) H(26) 2.294 ? . .
H(22) H(27) 2.943 ? . .
H(22) H(31) 3.015 ? . .
H(22) H(32) 3.559 ? . .
H(22) H(33) 2.954 ? . .
H(22) H(34) 2.268 ? . .
H(22) H(40) 2.762 ? . .
H(22) H(41) 2.322 ? . .
H(23) S(5) 3.234 ? . 2_565
H(23) N(1) 2.024 ? . .
H(23) C(17) 2.671 ? . .
H(23) C(18) 2.759 ? . .
H(23) C(22) 1.992 ? . .
H(23) C(23) 2.570 ? . .
H(23) C(25) 3.320 ? . .
H(23) C(29) 2.578 ? . .
H(23) H(13) 3.537 ? . .
H(23) H(14) 2.910 ? . .
H(23) H(15) 2.227 ? . .
H(23) H(16) 3.067 ? . .
H(23) H(22) 1.551 ? . .
H(23) H(24) 2.288 ? . .
H(23) H(25) 2.768 ? . .
H(23) H(26) 2.722 ? . .
H(23) H(27) 2.465 ? . .
H(23) H(31) 3.532 ? . .
H(23) H(40) 2.351 ? . .
H(23) H(41) 2.845 ? . .
H(24) N(1) 2.755 ? . .
H(24) C(6) 3.459 ? . 2_555
H(24) C(17) 2.759 ? . .
H(24) C(18) 3.312 ? . .
H(24) C(21) 2.019 ? . .
H(24) C(23) 2.133 ? . .
H(24) C(24) 2.708 ? . .
H(24) C(25) 3.315 ? . .
H(24) C(44) 3.414 ? . 1_454
H(24) H(14) 2.198 ? . .
H(24) H(15) 2.912 ? . .
H(24) H(22) 2.762 ? . .
H(24) H(23) 2.288 ? . .
H(24) H(25) 1.551 ? . .
H(24) H(26) 2.866 ? . .
H(24) H(27) 2.365 ? . .
H(24) H(28) 2.812 ? . .
H(24) H(30) 2.658 ? . .
H(24) H(31) 2.875 ? . .
H(24) H(73) 2.998 ? . 1_454
H(24) H(74) 2.988 ? . 1_454
H(25) N(1) 2.758 ? . .
H(25) C(5) 3.543 ? . 2_555
H(25) C(17) 3.386 ? . .
H(25) C(21) 2.022 ? . .
H(25) C(23) 2.129 ? . .
H(25) C(24) 2.599 ? . .
H(25) C(25) 2.711 ? . .
H(25) C(26) 3.127 ? . .
H(25) H(1) 3.497 ? . 2_555
H(25) H(14) 2.961 ? . .
H(25) H(22) 2.289 ? . .
H(25) H(23) 2.768 ? . .
H(25) H(24) 1.551 ? . .
H(25) H(26) 2.468 ? . .
H(25) H(27) 2.864 ? . .
H(25) H(28) 3.144 ? . .
H(25) H(29) 3.327 ? . .
H(25) H(30) 2.190 ? . .
H(25) H(31) 2.210 ? . .
H(25) H(34) 2.632 ? . .
H(26) S(5) 3.252 ? . .
H(26) S(7) 3.203 ? . .
H(26) C(21) 2.544 ? . .
H(26) C(22) 2.111 ? . .
H(26) C(24) 1.875 ? . .
H(26) H(22) 2.294 ? . .
H(26) H(23) 2.722 ? . .
H(26) H(24) 2.866 ? . .
H(26) H(25) 2.468 ? . .
H(26) H(27) 1.551 ? . .
H(26) H(28) 2.631 ? . .
H(26) H(29) 2.007 ? . .
H(26) H(30) 2.322 ? . .
H(26) H(40) 3.423 ? . 2_565
H(27) S(1) 3.523 ? . 2_565
H(27) C(21) 2.698 ? . .
H(27) C(22) 2.110 ? . .
H(27) C(24) 1.835 ? . .
H(27) C(44) 3.535 ? . 1_454
H(27) H(5) 3.593 ? . 1_465
H(27) H(22) 2.943 ? . .
H(27) H(23) 2.465 ? . .
H(27) H(24) 2.365 ? . .
H(27) H(25) 2.864 ? . .
H(27) H(26) 1.551 ? . .
H(27) H(28) 1.999 ? . .
H(27) H(29) 2.296 ? . .
H(27) H(30) 2.575 ? . .
H(27) H(73) 3.487 ? . 1_454
H(27) H(74) 3.194 ? . 1_454
H(27) H(75) 3.350 ? . 1_454
H(28) C(8) 3.135 ? . 1_465
H(28) C(22) 2.825 ? . .
H(28) C(23) 1.882 ? . .
H(28) H(1) 3.532 ? . 2_555
H(28) H(4) 3.282 ? . 1_465
H(28) H(5) 2.770 ? . 1_465
H(28) H(5) 3.317 ? . 2_555
H(28) H(6) 2.855 ? . 1_465
H(28) H(24) 2.812 ? . .
H(28) H(25) 3.144 ? . .
H(28) H(26) 2.631 ? . .
H(28) H(27) 1.999 ? . .
H(28) H(29) 1.551 ? . .
H(28) H(30) 1.551 ? . .
H(28) H(71) 2.859 ? . 2_566
H(28) H(74) 2.933 ? . 1_454
H(28) H(74) 3.230 ? . 2_566
H(29) S(7) 3.319 ? . .
H(29) C(8) 3.598 ? . 1_465
H(29) C(22) 3.193 ? . .
H(29) C(23) 1.851 ? . .
H(29) C(43) 3.566 ? . 2_566
H(29) H(4) 3.474 ? . 1_465
H(29) H(6) 3.138 ? . 1_465
H(29) H(25) 3.327 ? . .
H(29) H(26) 2.007 ? . .
H(29) H(27) 2.296 ? . .
H(29) H(28) 1.551 ? . .
H(29) H(30) 1.551 ? . .
H(29) H(44) 3.564 ? . 2_565
H(29) H(71) 2.645 ? . 2_566
H(30) C(7) 3.381 ? . 2_555
H(30) C(22) 2.349 ? . .
H(30) C(23) 1.843 ? . .
H(30) H(1) 2.548 ? . 2_555
H(30) H(24) 2.658 ? . .
H(30) H(25) 2.190 ? . .
H(30) H(26) 2.322 ? . .
H(30) H(27) 2.575 ? . .
H(30) H(28) 1.551 ? . .
H(30) H(29) 1.551 ? . .
H(30) H(71) 2.812 ? . 2_566
H(31) Se(1) 3.132 ? . 2_555
H(31) N(1) 2.035 ? . .
H(31) C(3) 3.483 ? . 2_555
H(31) C(4) 3.171 ? . 2_555
H(31) C(17) 2.554 ? . .
H(31) C(21) 2.694 ? . .
H(31) C(22) 2.691 ? . .
H(31) C(26) 2.027 ? . .
H(31) C(27) 2.628 ? . .
H(31) C(29) 3.336 ? . .
H(31) H(13) 2.744 ? . .
H(31) H(14) 2.362 ? . .
H(31) H(22) 3.015 ? . .
H(31) H(23) 3.532 ? . .
H(31) H(24) 2.875 ? . .
H(31) H(25) 2.210 ? . .
H(31) H(32) 1.551 ? . .
H(31) H(33) 2.790 ? . .
H(31) H(34) 2.313 ? . .
H(31) H(35) 2.473 ? . .
H(31) H(36) 2.787 ? . .
H(31) H(41) 3.547 ? . .
H(32) N(1) 2.035 ? . .
H(32) C(17) 2.552 ? . .
H(32) C(21) 3.321 ? . .
H(32) C(26) 2.021 ? . .
H(32) C(27) 2.620 ? . .
H(32) C(29) 2.715 ? . .
H(32) C(30) 2.758 ? . .
H(32) H(13) 2.286 ? . .
H(32) H(14) 2.842 ? . .
H(32) H(22) 3.559 ? . .
H(32) H(31) 1.551 ? . .
H(32) H(33) 2.314 ? . .
H(32) H(34) 2.781 ? . .
H(32) H(35) 2.940 ? . .
H(32) H(36) 2.349 ? . .
H(32) H(36) 2.854 ? . 2_555
H(32) H(37) 3.136 ? . 2_555
H(32) H(40) 3.567 ? . .
H(32) H(41) 2.992 ? . .
H(32) H(42) 2.264 ? . .
H(32) H(43) 2.948 ? . .
H(33) S(1) 2.812 ? . .
H(33) S(3) 3.327 ? . .
H(33) N(1) 2.773 ? . .
H(33) C(1) 2.994 ? . .
H(33) C(21) 3.370 ? . .
H(33) C(25) 2.046 ? . .
H(33) C(27) 2.010 ? . .
H(33) C(28) 2.680 ? . .
H(33) C(29) 2.748 ? . .
H(33) C(30) 3.186 ? . .
H(33) H(22) 2.954 ? . .
H(33) H(31) 2.790 ? . .
H(33) H(32) 2.314 ? . .
H(33) H(34) 1.551 ? . .
H(33) H(35) 2.755 ? . .
H(33) H(36) 2.317 ? . .
H(33) H(37) 2.810 ? . .
H(33) H(38) 3.574 ? . .
H(33) H(39) 2.635 ? . .
H(33) H(41) 2.219 ? . .
H(33) H(42) 2.707 ? . .
H(34) S(1) 3.513 ? . .
H(34) S(5) 3.352 ? . .
H(34) N(1) 2.771 ? . .
H(34) C(21) 2.755 ? . .
H(34) C(22) 3.133 ? . .
H(34) C(25) 2.040 ? . .
H(34) C(27) 2.012 ? . .
H(34) C(28) 2.774 ? . .
H(34) C(29) 3.362 ? . .
H(34) H(22) 2.268 ? . .
H(34) H(25) 2.632 ? . .
H(34) H(31) 2.313 ? . .
H(34) H(32) 2.781 ? . .
H(34) H(33) 1.551 ? . .
H(34) H(35) 2.242 ? . .
H(34) H(36) 2.753 ? . .
H(34) H(37) 3.358 ? . .
H(34) H(38) 3.450 ? . .
H(34) H(39) 2.513 ? . .
H(34) H(41) 2.923 ? . .
H(34) H(56) 3.331 ? . .
H(34) H(57) 3.216 ? . .
H(35) Se(1) 3.557 ? . 2_555
H(35) C(25) 2.667 ? . .
H(35) C(26) 1.992 ? . .
H(35) C(28) 1.991 ? . .
H(35) C(32) 3.478 ? . 2_555
H(35) H(31) 2.473 ? . .
H(35) H(32) 2.940 ? . .
H(35) H(33) 2.755 ? . .
H(35) H(34) 2.242 ? . .
H(35) H(36) 1.551 ? . .
H(35) H(37) 2.713 ? . .
H(35) H(38) 2.154 ? . .
H(35) H(39) 2.448 ? . .
H(35) H(42) 3.243 ? . 2_555
H(35) H(46) 3.071 ? . 2_555
H(35) H(48) 3.029 ? . 2_555
H(35) H(56) 3.202 ? . .
H(36) C(25) 2.558 ? . .
H(36) C(26) 1.989 ? . .
H(36) C(28) 2.002 ? . .
H(36) C(30) 3.197 ? . 2_555
H(36) H(31) 2.787 ? . .
H(36) H(32) 2.349 ? . .
H(36) H(32) 2.854 ? . 2_555
H(36) H(33) 2.317 ? . .
H(36) H(34) 2.753 ? . .
H(36) H(35) 1.551 ? . .
H(36) H(36) 3.187 ? . 2_555
H(36) H(37) 2.151 ? . .
H(36) H(38) 2.464 ? . .
H(36) H(39) 2.725 ? . .
H(36) H(42) 2.327 ? . 2_555
H(36) H(43) 3.362 ? . 2_555
H(36) H(46) 3.496 ? . 2_555
H(36) H(48) 3.423 ? . 2_555
H(37) S(4) 3.309 ? . .
H(37) C(1) 3.246 ? . .
H(37) C(2) 3.070 ? . .
H(37) C(26) 2.933 ? . .
H(37) C(27) 2.007 ? . .
H(37) H(13) 3.194 ? . 2_555
H(37) H(32) 3.136 ? . 2_555
H(37) H(33) 2.810 ? . .
H(37) H(34) 3.358 ? . .
H(37) H(35) 2.713 ? . .
H(37) H(36) 2.151 ? . .
H(37) H(38) 1.551 ? . .
H(37) H(39) 1.551 ? . .
H(37) H(42) 3.150 ? . 2_555
H(37) H(43) 3.213 ? . 2_555
H(38) C(26) 3.282 ? . .
H(38) C(27) 2.025 ? . .
H(38) C(30) 3.558 ? . 2_555
H(38) C(32) 3.546 ? . 2_555
H(38) H(10) 3.311 ? . 2_566
H(38) H(33) 3.574 ? . .
H(38) H(34) 3.450 ? . .
H(38) H(35) 2.154 ? . .
H(38) H(36) 2.464 ? . .
H(38) H(37) 1.551 ? . .
H(38) H(39) 1.551 ? . .
H(38) H(42) 3.228 ? . 2_555
H(38) H(43) 3.097 ? . 2_555
H(38) H(48) 2.687 ? . 2_555
H(38) H(52) 3.501 ? . .
H(38) H(53) 2.852 ? . .
H(38) H(56) 3.581 ? . .
H(39) Ni(1) 3.359 ? . .
H(39) S(2) 3.258 ? . .
H(39) C(1) 3.413 ? . .
H(39) C(2) 3.250 ? . .
H(39) C(26) 2.556 ? . .
H(39) C(27) 2.008 ? . .
H(39) C(35) 3.564 ? . .
H(39) C(36) 3.400 ? . .
H(39) H(33) 2.635 ? . .
H(39) H(34) 2.513 ? . .
H(39) H(35) 2.448 ? . .
H(39) H(36) 2.725 ? . .
H(39) H(37) 1.551 ? . .
H(39) H(38) 1.551 ? . .
H(39) H(52) 3.014 ? . .
H(39) H(53) 3.162 ? . .
H(39) H(56) 3.349 ? . .
H(39) H(57) 2.900 ? . .
H(40) S(7) 3.159 ? . 2_565
H(40) N(1) 2.044 ? . .
H(40) C(17) 2.728 ? . .
H(40) C(18) 2.737 ? . .
H(40) C(21) 2.561 ? . .
H(40) C(25) 3.338 ? . .
H(40) C(30) 2.007 ? . .
H(40) C(31) 2.607 ? . .
H(40) H(13) 3.070 ? . .
H(40) H(14) 3.556 ? . .
H(40) H(15) 2.844 ? . .
H(40) H(16) 2.306 ? . .
H(40) H(22) 2.762 ? . .
H(40) H(23) 2.351 ? . .
H(40) H(26) 3.423 ? . 2_565
H(40) H(32) 3.567 ? . .
H(40) H(41) 1.551 ? . .
H(40) H(42) 2.774 ? . .
H(40) H(43) 2.295 ? . .
H(40) H(44) 2.443 ? . .
H(40) H(45) 2.830 ? . .
H(41) S(1) 2.910 ? . .
H(41) N(1) 2.036 ? . .
H(41) C(17) 3.328 ? . .
H(41) C(21) 2.573 ? . .
H(41) C(25) 2.699 ? . .
H(41) C(26) 2.723 ? . .
H(41) C(30) 1.995 ? . .
H(41) C(31) 2.617 ? . .
H(41) H(13) 3.569 ? . .
H(41) H(22) 2.322 ? . .
H(41) H(23) 2.845 ? . .
H(41) H(31) 3.547 ? . .
H(41) H(32) 2.992 ? . .
H(41) H(33) 2.219 ? . .
H(41) H(34) 2.923 ? . .
H(41) H(40) 1.551 ? . .
H(41) H(42) 2.283 ? . .
H(41) H(43) 2.756 ? . .
H(41) H(44) 2.923 ? . .
H(41) H(45) 2.405 ? . .
H(42) S(3) 3.415 ? . .
H(42) N(1) 2.772 ? . .
H(42) C(17) 3.366 ? . .
H(42) C(25) 2.766 ? . .
H(42) C(26) 3.196 ? . .
H(42) C(27) 3.058 ? . 2_555
H(42) C(28) 3.335 ? . 2_555
H(42) C(29) 2.028 ? . .
H(42) C(31) 2.055 ? . .
H(42) C(32) 2.712 ? . .
H(42) H(13) 2.959 ? . .
H(42) H(32) 2.264 ? . .
H(42) H(33) 2.707 ? . .
H(42) H(35) 3.243 ? . 2_555
H(42) H(36) 2.327 ? . 2_555
H(42) H(37) 3.150 ? . 2_555
H(42) H(38) 3.228 ? . 2_555
H(42) H(40) 2.774 ? . .
H(42) H(41) 2.283 ? . .
H(42) H(43) 1.551 ? . .
H(42) H(44) 2.804 ? . .
H(42) H(45) 2.353 ? . .
H(42) H(46) 2.833 ? . .
H(42) H(48) 2.652 ? . .
H(43) N(1) 2.752 ? . .
H(43) C(16) 3.415 ? . 1_544
H(43) C(17) 2.738 ? . .
H(43) C(18) 3.089 ? . .
H(43) C(25) 3.363 ? . .
H(43) C(28) 3.496 ? . 2_555
H(43) C(29) 2.016 ? . .
H(43) C(31) 2.053 ? . .
H(43) C(32) 2.763 ? . .
H(43) H(10) 3.210 ? . 1_544
H(43) H(12) 2.890 ? . 1_544
H(43) H(13) 2.287 ? . .
H(43) H(16) 2.551 ? . .
H(43) H(32) 2.948 ? . .
H(43) H(36) 3.362 ? . 2_555
H(43) H(37) 3.213 ? . 2_555
H(43) H(38) 3.097 ? . 2_555
H(43) H(40) 2.295 ? . .
H(43) H(41) 2.756 ? . .
H(43) H(42) 1.551 ? . .
H(43) H(44) 2.316 ? . .
H(43) H(45) 2.800 ? . .
H(43) H(46) 3.338 ? . .
H(43) H(47) 3.454 ? . .
H(43) H(48) 2.458 ? . .
H(44) Se(3) 3.261 ? . 2_565
H(44) S(7) 3.066 ? . 2_565
H(44) C(29) 2.665 ? . .
H(44) C(30) 2.044 ? . .
H(44) C(32) 2.033 ? . .
H(44) H(4) 3.320 ? . 2_655
H(44) H(12) 3.124 ? . 1_544
H(44) H(29) 3.564 ? . 2_565
H(44) H(40) 2.443 ? . .
H(44) H(41) 2.923 ? . .
H(44) H(42) 2.804 ? . .
H(44) H(43) 2.316 ? . .
H(44) H(45) 1.551 ? . .
H(44) H(46) 2.755 ? . .
H(44) H(47) 2.202 ? . .
H(44) H(48) 2.479 ? . .
H(45) S(1) 3.460 ? . .
H(45) S(3) 3.028 ? . .
H(45) C(8) 3.226 ? . 2_655
H(45) C(29) 2.619 ? . .
H(45) C(30) 2.041 ? . .
H(45) C(32) 2.031 ? . .
H(45) H(4) 2.306 ? . 2_655
H(45) H(6) 3.488 ? . 2_655
H(45) H(40) 2.830 ? . .
H(45) H(41) 2.405 ? . .
H(45) H(42) 2.353 ? . .
H(45) H(43) 2.800 ? . .
H(45) H(44) 1.551 ? . .
H(45) H(46) 2.191 ? . .
H(45) H(47) 2.496 ? . .
H(45) H(48) 2.744 ? . .
H(46) Se(1) 3.324 ? . .
H(46) S(3) 3.097 ? . .
H(46) C(30) 2.949 ? . .
H(46) C(31) 2.045 ? . .
H(46) C(40) 3.549 ? . 1_544
H(46) H(4) 3.355 ? . 2_655
H(46) H(35) 3.071 ? . 2_555
H(46) H(36) 3.496 ? . 2_555
H(46) H(42) 2.833 ? . .
H(46) H(43) 3.338 ? . .
H(46) H(44) 2.755 ? . .
H(46) H(45) 2.191 ? . .
H(46) H(47) 1.551 ? . .
H(46) H(48) 1.551 ? . .
H(46) H(64) 3.570 ? . 1_544
H(46) H(65) 3.088 ? . 1_544
H(46) H(66) 3.431 ? . 1_544
H(47) Se(3) 3.250 ? . 2_565
H(47) C(30) 3.310 ? . .
H(47) C(31) 2.056 ? . .
H(47) C(40) 3.429 ? . 1_544
H(47) H(4) 3.517 ? . 2_655
H(47) H(12) 3.311 ? . 1_544
H(47) H(43) 3.454 ? . .
H(47) H(44) 2.202 ? . .
H(47) H(45) 2.496 ? . .
H(47) H(46) 1.551 ? . .
H(47) H(48) 1.551 ? . .
H(47) H(64) 3.138 ? . 1_544
H(47) H(65) 2.971 ? . 1_544
H(48) C(16) 3.571 ? . 1_544
H(48) C(27) 3.472 ? . 2_555
H(48) C(28) 3.414 ? . 2_555
H(48) C(30) 2.540 ? . .
H(48) C(31) 2.031 ? . .
H(48) H(10) 3.557 ? . 1_544
H(48) H(12) 2.789 ? . 1_544
H(48) H(35) 3.029 ? . 2_555
H(48) H(36) 3.423 ? . 2_555
H(48) H(38) 2.687 ? . 2_555
H(48) H(42) 2.652 ? . .
H(48) H(43) 2.458 ? . .
H(48) H(44) 2.479 ? . .
H(48) H(45) 2.744 ? . .
H(48) H(46) 1.551 ? . .
H(48) H(47) 1.551 ? . .
H(48) H(64) 3.263 ? . 1_544
H(48) H(65) 3.493 ? . 1_544
H(48) H(66) 3.526 ? . 1_544
H(49) Se(4) 3.280 ? . 2_566
H(49) N(2) 2.023 ? . .
H(49) C(14) 3.412 ? . 2_566
H(49) C(34) 2.007 ? . .
H(49) C(35) 2.636 ? . .
H(49) C(37) 3.308 ? . .
H(49) C(41) 2.586 ? . .
H(49) C(45) 2.669 ? . .
H(49) C(46) 2.749 ? . .
H(49) H(50) 1.551 ? . .
H(49) H(51) 2.768 ? . .
H(49) H(52) 2.292 ? . .
H(49) H(53) 2.520 ? . .
H(49) H(54) 2.794 ? . .
H(49) H(59) 3.517 ? . .
H(49) H(67) 2.837 ? . .
H(49) H(68) 2.356 ? . .
H(49) H(76) 2.923 ? . .
H(49) H(77) 3.530 ? . .
H(49) H(78) 2.841 ? . .
H(49) H(79) 2.367 ? . .
H(50) N(2) 2.027 ? . .
H(50) C(34) 2.007 ? . .
H(50) C(35) 2.631 ? . .
H(50) C(36) 3.553 ? . 2_566
H(50) C(37) 2.726 ? . .
H(50) C(38) 2.744 ? . .
H(50) C(41) 2.530 ? . .
H(50) C(45) 3.319 ? . .
H(50) H(49) 1.551 ? . .
H(50) H(51) 2.293 ? . .
H(50) H(52) 2.768 ? . .
H(50) H(53) 2.987 ? . .
H(50) H(54) 2.372 ? . .
H(50) H(54) 3.007 ? . 2_566
H(50) H(55) 2.795 ? . 2_566
H(50) H(58) 3.560 ? . .
H(50) H(59) 3.047 ? . .
H(50) H(60) 2.312 ? . .
H(50) H(61) 2.846 ? . .
H(50) H(67) 2.296 ? . .
H(50) H(68) 2.752 ? . .
H(50) H(76) 3.543 ? . .
H(51) S(6) 3.115 ? . .
H(51) S(8) 3.213 ? . .
H(51) N(2) 2.752 ? . .
H(51) C(10) 3.119 ? . .
H(51) C(33) 2.025 ? . .
H(51) C(35) 2.017 ? . .
H(51) C(36) 2.652 ? . .
H(51) C(37) 2.684 ? . .
H(51) C(38) 2.997 ? . .
H(51) C(45) 3.408 ? . .
H(51) H(49) 2.768 ? . .
H(51) H(50) 2.293 ? . .
H(51) H(52) 1.551 ? . .
H(51) H(53) 2.765 ? . .
H(51) H(54) 2.343 ? . .
H(51) H(54) 3.431 ? . 2_566
H(51) H(55) 2.779 ? . .
H(51) H(56) 3.552 ? . .
H(51) H(57) 2.586 ? . .
H(51) H(58) 3.588 ? . .
H(51) H(59) 2.209 ? . .
H(51) H(60) 2.460 ? . .
H(51) H(76) 2.999 ? . .
H(52) S(2) 3.426 ? . .
H(52) S(6) 3.193 ? . .
H(52) N(2) 2.752 ? . .
H(52) C(33) 2.026 ? . .
H(52) C(35) 2.021 ? . .
H(52) C(36) 2.771 ? . .
H(52) C(37) 3.277 ? . .
H(52) C(45) 2.783 ? . .
H(52) C(46) 3.328 ? . .
H(52) H(38) 3.501 ? . .
H(52) H(39) 3.014 ? . .
H(52) H(49) 2.292 ? . .
H(52) H(50) 2.768 ? . .
H(52) H(51) 1.551 ? . .
H(52) H(53) 2.250 ? . .
H(52) H(54) 2.766 ? . .
H(52) H(55) 3.355 ? . .
H(52) H(56) 3.449 ? . .
H(52) H(57) 2.500 ? . .
H(52) H(59) 2.826 ? . .
H(52) H(76) 2.238 ? . .
H(52) H(79) 2.878 ? . .
H(53) Se(4) 3.548 ? . 2_566
H(53) C(28) 3.423 ? . .
H(53) C(33) 2.715 ? . .
H(53) C(34) 2.009 ? . .
H(53) C(36) 2.014 ? . .
H(53) H(38) 2.852 ? . .
H(53) H(39) 3.162 ? . .
H(53) H(49) 2.520 ? . .
H(53) H(50) 2.987 ? . .
H(53) H(51) 2.765 ? . .
H(53) H(52) 2.250 ? . .
H(53) H(54) 1.551 ? . .
H(53) H(55) 2.731 ? . .
H(53) H(56) 2.184 ? . .
H(53) H(57) 2.469 ? . .
H(53) H(60) 3.367 ? . 2_566
H(53) H(64) 3.276 ? . 2_566
H(53) H(66) 3.268 ? . 2_566
H(54) C(33) 2.581 ? . .
H(54) C(34) 2.008 ? . .
H(54) C(36) 2.031 ? . .
H(54) C(38) 3.377 ? . 2_566
H(54) H(49) 2.794 ? . .
H(54) H(50) 2.372 ? . .
H(54) H(50) 3.007 ? . 2_566
H(54) H(51) 2.343 ? . .
H(54) H(51) 3.431 ? . 2_566
H(54) H(52) 2.766 ? . .
H(54) H(53) 1.551 ? . .
H(54) H(54) 2.916 ? . 2_566
H(54) H(55) 2.179 ? . .
H(54) H(56) 2.496 ? . .
H(54) H(57) 2.749 ? . .
H(54) H(60) 2.492 ? . 2_566
H(54) H(61) 3.557 ? . 2_566
H(55) S(7) 3.540 ? . .
H(55) C(9) 3.458 ? . .
H(55) C(10) 3.584 ? . .
H(55) C(11) 3.492 ? . .
H(55) C(34) 2.926 ? . .
H(55) C(35) 2.024 ? . .
H(55) H(50) 2.795 ? . 2_566
H(55) H(51) 2.779 ? . .
H(55) H(52) 3.355 ? . .
H(55) H(53) 2.731 ? . .
H(55) H(54) 2.179 ? . .
H(55) H(56) 1.551 ? . .
H(55) H(57) 1.551 ? . .
H(55) H(60) 3.100 ? . 2_566
H(55) H(61) 3.234 ? . 2_566
H(55) H(67) 3.311 ? . 2_566
H(56) C(34) 3.287 ? . .
H(56) C(35) 2.049 ? . .
H(56) C(38) 3.521 ? . 2_566
H(56) H(34) 3.331 ? . .
H(56) H(35) 3.202 ? . .
H(56) H(38) 3.581 ? . .
H(56) H(39) 3.349 ? . .
H(56) H(51) 3.552 ? . .
H(56) H(52) 3.449 ? . .
H(56) H(53) 2.184 ? . .
H(56) H(54) 2.496 ? . .
H(56) H(55) 1.551 ? . .
H(56) H(57) 1.551 ? . .
H(56) H(60) 3.162 ? . 2_566
H(56) H(61) 3.055 ? . 2_566
H(56) H(66) 2.841 ? . 2_566
H(57) Ni(1) 3.543 ? . .
H(57) S(5) 3.255 ? . .
H(57) S(6) 3.582 ? . .
H(57) C(9) 2.947 ? . .
H(57) C(10) 3.101 ? . .
H(57) C(34) 2.540 ? . .
H(57) C(35) 2.029 ? . .
H(57) H(34) 3.216 ? . .
H(57) H(39) 2.900 ? . .
H(57) H(51) 2.586 ? . .
H(57) H(52) 2.500 ? . .
H(57) H(53) 2.469 ? . .
H(57) H(54) 2.749 ? . .
H(57) H(55) 1.551 ? . .
H(57) H(56) 1.551 ? . .
H(58) S(2) 3.021 ? . 2_666
H(58) N(2) 2.029 ? . .
H(58) C(33) 3.313 ? . .
H(58) C(38) 2.007 ? . .
H(58) C(39) 2.573 ? . .
H(58) C(41) 2.683 ? . .
H(58) C(42) 2.752 ? . .
H(58) C(45) 2.546 ? . .
H(58) H(50) 3.560 ? . .
H(58) H(51) 3.588 ? . .
H(58) H(59) 1.551 ? . .
H(58) H(60) 2.777 ? . .
H(58) H(61) 2.314 ? . .
H(58) H(62) 2.393 ? . .
H(58) H(63) 2.804 ? . .
H(58) H(67) 2.974 ? . .
H(58) H(68) 3.531 ? . .
H(58) H(69) 2.842 ? . .
H(58) H(70) 2.352 ? . .
H(58) H(76) 2.815 ? . .
H(58) H(77) 2.289 ? . .
H(58) H(80) 3.384 ? . 2_666
H(59) S(6) 3.070 ? . .
H(59) N(2) 2.019 ? . .
H(59) C(33) 2.693 ? . .
H(59) C(34) 2.690 ? . .
H(59) C(38) 1.994 ? . .
H(59) C(39) 2.639 ? . .
H(59) C(41) 3.311 ? . .
H(59) C(45) 2.510 ? . .
H(59) H(49) 3.517 ? . .
H(59) H(50) 3.047 ? . .
H(59) H(51) 2.209 ? . .
H(59) H(52) 2.826 ? . .
H(59) H(58) 1.551 ? . .
H(59) H(60) 2.271 ? . .
H(59) H(61) 2.757 ? . .
H(59) H(62) 2.934 ? . .
H(59) H(63) 2.439 ? . .
H(59) H(67) 3.545 ? . .
H(59) H(76) 2.294 ? . .
H(59) H(77) 2.717 ? . .
H(59) H(80) 3.585 ? . 2_666
H(59) H(81) 3.555 ? . 2_666
H(60) N(2) 2.787 ? . .
H(60) C(33) 2.744 ? . .
H(60) C(34) 3.028 ? . .
H(60) C(35) 3.169 ? . 2_566
H(60) C(36) 3.318 ? . 2_566
H(60) C(37) 2.032 ? . .
H(60) C(39) 2.060 ? . .
H(60) C(40) 2.721 ? . .
H(60) C(41) 3.449 ? . .
H(60) H(50) 2.312 ? . .
H(60) H(51) 2.460 ? . .
H(60) H(53) 3.367 ? . 2_566
H(60) H(54) 2.492 ? . 2_566
H(60) H(55) 3.100 ? . 2_566
H(60) H(56) 3.162 ? . 2_566
H(60) H(58) 2.777 ? . .
H(60) H(59) 2.271 ? . .
H(60) H(61) 1.551 ? . .
H(60) H(62) 2.813 ? . .
H(60) H(63) 2.343 ? . .
H(60) H(64) 2.837 ? . .
H(60) H(66) 2.658 ? . .
H(60) H(67) 3.049 ? . .
H(61) N(2) 2.723 ? . .
H(61) C(7) 3.290 ? . 1_566
H(61) C(33) 3.264 ? . .
H(61) C(36) 3.510 ? . 2_566
H(61) C(37) 2.016 ? . .
H(61) C(39) 2.048 ? . .
H(61) C(40) 2.747 ? . .
H(61) C(41) 2.749 ? . .
H(61) C(42) 3.263 ? . .
H(61) H(1) 2.831 ? . 1_566
H(61) H(3) 2.898 ? . 1_566
H(61) H(50) 2.846 ? . .
H(61) H(54) 3.557 ? . 2_566
H(61) H(55) 3.234 ? . 2_566
H(61) H(56) 3.055 ? . 2_566
H(61) H(58) 2.314 ? . .
H(61) H(59) 2.757 ? . .
H(61) H(60) 1.551 ? . .
H(61) H(62) 2.327 ? . .
H(61) H(63) 2.794 ? . .
H(61) H(64) 3.316 ? . .
H(61) H(65) 3.445 ? . .
H(61) H(66) 2.421 ? . .
H(61) H(67) 2.229 ? . .
H(61) H(70) 2.791 ? . .
H(62) S(2) 3.440 ? . 2_666
H(62) S(4) 3.048 ? . 2_666
H(62) C(2) 3.357 ? . 2_666
H(62) C(7) 3.388 ? . 1_566
H(62) C(37) 2.644 ? . .
H(62) C(38) 2.050 ? . .
H(62) C(40) 2.047 ? . .
H(62) H(1) 3.587 ? . 1_566
H(62) H(3) 2.531 ? . 1_566
H(62) H(58) 2.393 ? . .
H(62) H(59) 2.934 ? . .
H(62) H(60) 2.813 ? . .
H(62) H(61) 2.327 ? . .
H(62) H(63) 1.551 ? . .
H(62) H(64) 2.772 ? . .
H(62) H(65) 2.223 ? . .
H(62) H(66) 2.480 ? . .
H(62) H(80) 3.024 ? . 2_666
H(62) H(83) 3.419 ? . 2_666
H(63) S(8) 2.998 ? . .
H(63) C(37) 2.622 ? . .
H(63) C(38) 2.037 ? . .
H(63) C(40) 2.030 ? . .
H(63) C(47) 3.459 ? . 2_666
H(63) H(7) 3.591 ? . 2_576
H(63) H(58) 2.804 ? . .
H(63) H(59) 2.439 ? . .
H(63) H(60) 2.343 ? . .
H(63) H(61) 2.794 ? . .
H(63) H(62) 1.551 ? . .
H(63) H(64) 2.200 ? . .
H(63) H(65) 2.503 ? . .
H(63) H(66) 2.734 ? . .
H(63) H(80) 3.063 ? . 2_666
H(63) H(81) 3.149 ? . 2_666
H(63) H(83) 3.235 ? . 2_666
H(64) Se(4) 3.137 ? . .
H(64) C(32) 3.509 ? . 1_566
H(64) C(38) 2.949 ? . .
H(64) C(39) 2.058 ? . .
H(64) H(7) 3.290 ? . 2_576
H(64) H(46) 3.570 ? . 1_566
H(64) H(47) 3.138 ? . 1_566
H(64) H(48) 3.263 ? . 1_566
H(64) H(53) 3.276 ? . 2_566
H(64) H(60) 2.837 ? . .
H(64) H(61) 3.316 ? . .
H(64) H(62) 2.772 ? . .
H(64) H(63) 2.200 ? . .
H(64) H(65) 1.551 ? . .
H(64) H(66) 1.551 ? . .
H(65) C(32) 3.359 ? . 1_566
H(65) C(38) 3.315 ? . .
H(65) C(39) 2.065 ? . .
H(65) H(3) 3.084 ? . 1_566
H(65) H(46) 3.088 ? . 1_566
H(65) H(47) 2.971 ? . 1_566
H(65) H(48) 3.493 ? . 1_566
H(65) H(61) 3.445 ? . .
H(65) H(62) 2.223 ? . .
H(65) H(63) 2.503 ? . .
H(65) H(64) 1.551 ? . .
H(65) H(66) 1.551 ? . .
H(66) Se(1) 3.537 ? . 1_566
H(66) C(7) 3.593 ? . 1_566
H(66) C(36) 3.589 ? . 2_566
H(66) C(38) 2.525 ? . .
H(66) C(39) 2.023 ? . .
H(66) H(1) 3.503 ? . 1_566
H(66) H(3) 2.915 ? . 1_566
H(66) H(46) 3.431 ? . 1_566
H(66) H(48) 3.526 ? . 1_566
H(66) H(53) 3.268 ? . 2_566
H(66) H(56) 2.841 ? . 2_566
H(66) H(60) 2.658 ? . .
H(66) H(61) 2.421 ? . .
H(66) H(62) 2.480 ? . .
H(66) H(63) 2.734 ? . .
H(66) H(64) 1.551 ? . .
H(66) H(65) 1.551 ? . .
H(67) N(2) 2.018 ? . .
H(67) C(33) 2.547 ? . .
H(67) C(37) 2.695 ? . .
H(67) C(38) 2.771 ? . .
H(67) C(42) 2.011 ? . .
H(67) C(43) 2.673 ? . .
H(67) C(45) 3.303 ? . .
H(67) H(1) 3.472 ? . 1_566
H(67) H(49) 2.837 ? . .
H(67) H(50) 2.296 ? . .
H(67) H(55) 3.311 ? . 2_566
H(67) H(58) 2.974 ? . .
H(67) H(59) 3.545 ? . .
H(67) H(60) 3.049 ? . .
H(67) H(61) 2.229 ? . .
H(67) H(68) 1.551 ? . .
H(67) H(69) 2.771 ? . .
H(67) H(70) 2.260 ? . .
H(67) H(71) 2.462 ? . .
H(67) H(72) 3.001 ? . .
H(67) H(77) 3.533 ? . .
H(67) H(78) 3.529 ? . .
H(68) Se(3) 3.223 ? . 2_566
H(68) N(2) 2.019 ? . .
H(68) C(13) 3.332 ? . 2_566
H(68) C(33) 2.548 ? . .
H(68) C(37) 3.312 ? . .
H(68) C(42) 2.010 ? . .
H(68) C(43) 2.564 ? . .
H(68) C(45) 2.681 ? . .
H(68) C(46) 2.711 ? . .
H(68) H(9) 3.533 ? . 2_566
H(68) H(49) 2.356 ? . .
H(68) H(50) 2.752 ? . .
H(68) H(58) 3.531 ? . .
H(68) H(67) 1.551 ? . .
H(68) H(69) 2.343 ? . .
H(68) H(70) 2.771 ? . .
H(68) H(71) 2.749 ? . .
H(68) H(72) 2.401 ? . .
H(68) H(76) 3.519 ? . .
H(68) H(77) 3.001 ? . .
H(68) H(78) 2.126 ? . .
H(68) H(79) 3.042 ? . .
H(69) Ni(1) 3.574 ? . 2_666
H(69) S(6) 3.211 ? . 2_666
H(69) N(2) 2.736 ? . .
H(69) C(37) 3.289 ? . .
H(69) C(41) 2.034 ? . .
H(69) C(43) 2.047 ? . .
H(69) C(44) 2.721 ? . .
H(69) C(45) 2.706 ? . .
H(69) C(46) 3.140 ? . .
H(69) H(19) 2.739 ? . 1_656
H(69) H(58) 2.842 ? . .
H(69) H(67) 2.771 ? . .
H(69) H(68) 2.343 ? . .
H(69) H(70) 1.551 ? . .
H(69) H(71) 2.800 ? . .
H(69) H(72) 2.295 ? . .
H(69) H(73) 2.828 ? . .
H(69) H(75) 2.694 ? . .
H(69) H(76) 3.593 ? . .
H(69) H(77) 2.199 ? . .
H(69) H(78) 2.712 ? . .
H(69) H(81) 3.369 ? . .
H(70) S(2) 3.377 ? . 2_666
H(70) N(2) 2.847 ? . .
H(70) C(7) 3.183 ? . 1_566
H(70) C(37) 2.853 ? . .
H(70) C(38) 3.284 ? . .
H(70) C(41) 2.037 ? . .
H(70) C(43) 2.029 ? . .
H(70) C(44) 2.658 ? . .
H(70) C(45) 3.462 ? . .
H(70) H(1) 2.831 ? . 1_566
H(70) H(2) 2.899 ? . 1_566
H(70) H(3) 3.311 ? . 1_566
H(70) H(58) 2.352 ? . .
H(70) H(61) 2.791 ? . .
H(70) H(67) 2.260 ? . .
H(70) H(68) 2.771 ? . .
H(70) H(69) 1.551 ? . .
H(70) H(71) 2.340 ? . .
H(70) H(72) 2.775 ? . .
H(70) H(73) 3.218 ? . .
H(70) H(74) 3.369 ? . .
H(70) H(75) 2.323 ? . .
H(70) H(77) 3.055 ? . .
H(71) C(24) 2.938 ? . 2_566
H(71) C(41) 2.617 ? . .
H(71) C(42) 2.035 ? . .
H(71) C(44) 1.993 ? . .
H(71) H(1) 3.168 ? . 1_566
H(71) H(6) 3.105 ? . 2_656
H(71) H(28) 2.859 ? . 2_566
H(71) H(29) 2.645 ? . 2_566
H(71) H(30) 2.812 ? . 2_566
H(71) H(67) 2.462 ? . .
H(71) H(68) 2.749 ? . .
H(71) H(69) 2.800 ? . .
H(71) H(70) 2.340 ? . .
H(71) H(72) 1.551 ? . .
H(71) H(73) 2.726 ? . .
H(71) H(74) 2.154 ? . .
H(71) H(75) 2.437 ? . .
H(72) C(41) 2.667 ? . .
H(72) C(42) 2.019 ? . .
H(72) C(44) 1.977 ? . .
H(72) H(6) 3.237 ? . 2_656
H(72) H(9) 3.110 ? . 2_566
H(72) H(18) 3.201 ? . 1_656
H(72) H(19) 2.968 ? . 1_656
H(72) H(67) 3.001 ? . .
H(72) H(68) 2.401 ? . .
H(72) H(69) 2.295 ? . .
H(72) H(70) 2.775 ? . .
H(72) H(71) 1.551 ? . .
H(72) H(73) 2.141 ? . .
H(72) H(74) 2.442 ? . .
H(72) H(75) 2.695 ? . .
H(72) H(78) 3.418 ? . .
H(73) C(18) 3.190 ? . 1_656
H(73) C(19) 3.180 ? . 1_656
H(73) C(20) 3.398 ? . 1_656
H(73) C(42) 2.899 ? . .
H(73) C(43) 2.006 ? . .
H(73) H(14) 3.517 ? . 1_656
H(73) H(15) 2.516 ? . 1_656
H(73) H(18) 2.685 ? . 1_656
H(73) H(19) 2.794 ? . 1_656
H(73) H(24) 2.998 ? . 1_656
H(73) H(27) 3.487 ? . 1_656
H(73) H(69) 2.828 ? . .
H(73) H(70) 3.218 ? . .
H(73) H(71) 2.726 ? . .
H(73) H(72) 2.141 ? . .
H(73) H(74) 1.551 ? . .
H(73) H(75) 1.551 ? . .
H(74) C(8) 3.361 ? . 2_656
H(74) C(42) 3.261 ? . .
H(74) C(43) 2.004 ? . .
H(74) H(5) 3.150 ? . 1_566
H(74) H(5) 3.280 ? . 2_656
H(74) H(6) 2.680 ? . 2_656
H(74) H(24) 2.988 ? . 1_656
H(74) H(27) 3.194 ? . 1_656
H(74) H(28) 2.933 ? . 1_656
H(74) H(28) 3.230 ? . 2_566
H(74) H(70) 3.369 ? . .
H(74) H(71) 2.154 ? . .
H(74) H(72) 2.442 ? . .
H(74) H(73) 1.551 ? . .
H(74) H(75) 1.551 ? . .
H(75) Ni(1) 3.206 ? . 2_666
H(75) S(1) 3.061 ? . 2_666
H(75) C(42) 2.485 ? . .
H(75) C(43) 1.979 ? . .
H(75) H(1) 3.478 ? . 1_566
H(75) H(2) 2.919 ? . 1_566
H(75) H(5) 3.175 ? . 1_566
H(75) H(27) 3.350 ? . 1_656
H(75) H(69) 2.694 ? . .
H(75) H(70) 2.323 ? . .
H(75) H(71) 2.437 ? . .
H(75) H(72) 2.695 ? . .
H(75) H(73) 1.551 ? . .
H(75) H(74) 1.551 ? . .
H(76) S(2) 3.026 ? . .
H(76) S(6) 3.440 ? . .
H(76) N(2) 2.024 ? . .
H(76) C(33) 2.678 ? . .
H(76) C(34) 2.759 ? . .
H(76) C(37) 2.546 ? . .
H(76) C(41) 3.305 ? . .
H(76) C(46) 2.000 ? . .
H(76) C(47) 2.716 ? . .
H(76) H(49) 2.923 ? . .
H(76) H(50) 3.543 ? . .
H(76) H(51) 2.999 ? . .
H(76) H(52) 2.238 ? . .
H(76) H(58) 2.815 ? . .
H(76) H(59) 2.294 ? . .
H(76) H(68) 3.519 ? . .
H(76) H(69) 3.593 ? . .
H(76) H(77) 1.551 ? . .
H(76) H(78) 2.761 ? . .
H(76) H(79) 2.244 ? . .
H(76) H(80) 2.511 ? . .
H(76) H(81) 3.021 ? . .
H(77) S(6) 3.223 ? . 2_666
H(77) N(2) 2.023 ? . .
H(77) C(33) 3.315 ? . .
H(77) C(37) 2.506 ? . .
H(77) C(41) 2.693 ? . .
H(77) C(42) 2.757 ? . .
H(77) C(46) 2.003 ? . .
H(77) C(47) 2.541 ? . .
H(77) H(49) 3.530 ? . .
H(77) H(58) 2.289 ? . .
H(77) H(59) 2.717 ? . .
H(77) H(67) 3.533 ? . .
H(77) H(68) 3.001 ? . .
H(77) H(69) 2.199 ? . .
H(77) H(70) 3.055 ? . .
H(77) H(76) 1.551 ? . .
H(77) H(78) 2.351 ? . .
H(77) H(79) 2.768 ? . .
H(77) H(80) 2.730 ? . .
H(77) H(81) 2.357 ? . .
H(78) N(2) 2.698 ? . .
H(78) C(13) 3.439 ? . 2_566
H(78) C(15) 3.445 ? . 2_566
H(78) C(33) 3.284 ? . .
H(78) C(41) 2.651 ? . .
H(78) C(42) 3.127 ? . .
H(78) C(45) 2.024 ? . .
H(78) C(47) 2.116 ? . .
H(78) C(48) 2.726 ? . .
H(78) H(8) 3.034 ? . 2_566
H(78) H(9) 3.381 ? . 2_566
H(78) H(10) 3.504 ? . 2_566
H(78) H(19) 3.156 ? . 1_656
H(78) H(20) 3.553 ? . 1_656
H(78) H(49) 2.841 ? . .
H(78) H(67) 3.529 ? . .
H(78) H(68) 2.126 ? . .
H(78) H(69) 2.712 ? . .
H(78) H(72) 3.418 ? . .
H(78) H(76) 2.761 ? . .
H(78) H(77) 2.351 ? . .
H(78) H(79) 1.551 ? . .
H(78) H(80) 2.846 ? . .
H(78) H(81) 2.382 ? . .
H(78) H(82) 2.840 ? . .
H(78) H(84) 2.678 ? . .
H(79) N(2) 2.855 ? . .
H(79) C(14) 3.583 ? . 2_566
H(79) C(16) 3.518 ? . 2_566
H(79) C(33) 2.894 ? . .
H(79) C(34) 3.368 ? . .
H(79) C(41) 3.461 ? . .
H(79) C(45) 2.035 ? . .
H(79) C(47) 2.122 ? . .
H(79) C(48) 2.708 ? . .
H(79) H(10) 2.747 ? . 2_566
H(79) H(49) 2.367 ? . .
H(79) H(52) 2.878 ? . .
H(79) H(68) 3.042 ? . .
H(79) H(76) 2.244 ? . .
H(79) H(77) 2.768 ? . .
H(79) H(78) 1.551 ? . .
H(79) H(80) 2.402 ? . .
H(79) H(81) 2.855 ? . .
H(79) H(82) 3.273 ? . .
H(79) H(83) 3.413 ? . .
H(79) H(84) 2.370 ? . .
H(80) S(2) 2.935 ? . .
H(80) S(4) 3.267 ? . .
H(80) C(2) 3.563 ? . .
H(80) C(39) 3.483 ? . 2_666
H(80) C(45) 2.645 ? . .
H(80) C(46) 2.091 ? . .
H(80) C(48) 1.900 ? . .
H(80) H(58) 3.384 ? . 2_666
H(80) H(59) 3.585 ? . 2_666
H(80) H(62) 3.024 ? . 2_666
H(80) H(63) 3.063 ? . 2_666
H(80) H(76) 2.511 ? . .
H(80) H(77) 2.730 ? . .
H(80) H(78) 2.846 ? . .
H(80) H(79) 2.402 ? . .
H(80) H(81) 1.551 ? . .
H(80) H(82) 2.640 ? . .
H(80) H(83) 2.040 ? . .
H(80) H(84) 2.362 ? . .
H(81) S(6) 3.198 ? . 2_666
H(81) C(20) 3.309 ? . 1_656
H(81) C(45) 2.672 ? . .
H(81) C(46) 2.097 ? . .
H(81) C(48) 1.895 ? . .
H(81) H(19) 2.973 ? . 1_656
H(81) H(20) 3.136 ? . 1_656
H(81) H(21) 3.272 ? . 1_656
H(81) H(59) 3.555 ? . 2_666
H(81) H(63) 3.149 ? . 2_666
H(81) H(69) 3.369 ? . .
H(81) H(76) 3.021 ? . .
H(81) H(77) 2.357 ? . .
H(81) H(78) 2.382 ? . .
H(81) H(79) 2.855 ? . .
H(81) H(80) 1.551 ? . .
H(81) H(82) 2.043 ? . .
H(81) H(83) 2.351 ? . .
H(81) H(84) 2.636 ? . .
H(82) C(15) 3.588 ? . 1_645
H(82) C(20) 3.048 ? . 1_656
H(82) C(46) 2.897 ? . .
H(82) C(47) 1.908 ? . .
H(82) H(7) 3.479 ? . 1_645
H(82) H(8) 3.056 ? . 1_645
H(82) H(8) 3.300 ? . 2_566
H(82) H(17) 3.311 ? . 2_555
H(82) H(19) 3.155 ? . 1_656
H(82) H(20) 2.325 ? . 1_656
H(82) H(20) 2.936 ? . 2_555
H(82) H(21) 3.253 ? . 1_656
H(82) H(78) 2.840 ? . .
H(82) H(79) 3.273 ? . .
H(82) H(80) 2.640 ? . .
H(82) H(81) 2.043 ? . .
H(82) H(82) 3.453 ? . 2_656
H(82) H(83) 1.551 ? . .
H(82) H(84) 1.551 ? . .
H(83) S(4) 3.125 ? . .
H(83) C(19) 3.542 ? . 2_555
H(83) C(46) 3.257 ? . .
H(83) C(47) 1.903 ? . .
H(83) H(7) 3.341 ? . 1_645
H(83) H(8) 3.494 ? . 1_645
H(83) H(9) 3.487 ? . 1_645
H(83) H(17) 2.850 ? . 2_555
H(83) H(18) 3.525 ? . 2_555
H(83) H(20) 3.405 ? . 2_555
H(83) H(62) 3.419 ? . 2_666
H(83) H(63) 3.235 ? . 2_666
H(83) H(79) 3.413 ? . .
H(83) H(80) 2.040 ? . .
H(83) H(81) 2.351 ? . .
H(83) H(82) 1.551 ? . .
H(83) H(84) 1.551 ? . .
H(84) C(16) 3.593 ? . 2_566
H(84) C(19) 3.176 ? . 2_555
H(84) C(20) 3.452 ? . 2_555
H(84) C(46) 2.468 ? . .
H(84) C(47) 1.904 ? . .
H(84) H(8) 3.172 ? . 2_566
H(84) H(10) 2.890 ? . 2_566
H(84) H(11) 3.494 ? . 2_566
H(84) H(17) 2.339 ? . 2_555
H(84) H(18) 3.574 ? . 2_555
H(84) H(20) 2.884 ? . 2_555
H(84) H(78) 2.678 ? . .
H(84) H(79) 2.370 ? . .
H(84) H(80) 2.362 ? . .
H(84) H(81) 2.636 ? . .
H(84) H(82) 1.551 ? . .
H(84) H(83) 1.551 ? . .


#==============================================================================

# Additional structures and associated data_? identifiers
# should be added at this point if there is more than one 
# structure analysis in the CIF.

#==============================================================================

#     End of CIF

#==============================================================================
